# Supplementary material for: Modulation of the Activity and Regioselectivity of a Glycosidase: Development of a Convenient Tool for the Synthesis of Specific Disaccharides
Source: MDPI journal article supplement (doi:10.3390/molecules26185445), 2021-09-07
Supplement: s1 [file s1]

## Supplementary Informations

Yari Cabezas-Péruce,<sup>a</sup> Franck Daligault,<sup>b</sup> Vincent Ferrières,<sup>a</sup> Olivier Tasseau,<sup>a</sup> Sylvain Tranchimand.<sup>a\*</sup>

<sup>a</sup> Université de Rennes, Ecole Nationale Supérieure de Chimie de Rennes, CNRS, ISCR (Institut des Sciences Chimiques de Rennes) – UMR 6226, F-35000 Rennes, France.

<sup>b</sup> Université de Nantes, CNRS, UFIP (Unité de Fonctionnalité et Ingénierie des Protéines) - UMR 6286, F-44000 Nantes, France.

\* Author to whom correspondence should be addressed.

### Table of content

#### Additional figures:

- **Figure S1:** Transglycosylation between Gal $\beta$ -octyl (10 mM) and Man $\alpha$ -pNP (20-100 mM) with different donor/acceptor ratios. .... 3
- **Figure S2:** Transglycosylation improvement factors of the 120 screened mutants. .... 3
- **Table S1:** parameters  $a_x$ ,  $b_x$  and  $\alpha_x$  of MD complexes to study Man $\alpha$ -pNP orientations approaching Gal $\beta$ -enzyme intermediates..... 4
- **Figures S3:** Gal $\beta$ -enzyme intermediates interacting with Man $\alpha$ -pNP after MD starting from the different (1 $\rightarrow$ X)-oriented Man $\alpha$ -pNP (X = 3, 6, 4; enzyme = CtAra $\beta$ 51 WT, CtAra $\beta$ 51 S214T, CtAra $\beta$ 51 S214T E225D, CtAra $\beta$ 51 E225D, CtAra $\beta$ 51 D327N)..... 5
- **Figure S4:** Secondary structure of CtAra $\beta$ 51 wild type and selected mutants. .... 13
- **Figures S5:** B-Factor maps per residue on MD complexes for CtAra $\beta$ 51WT - Gal $\beta$  and CtAra $\beta$ 51 S214T - Gal $\beta$  intermediates interacting with Man $\alpha$ -pNP according to its initial (1 $\rightarrow$ X)-orientation (X = 3, 6, 4; enzyme = CtAra $\beta$ 51 WT, CtAra $\beta$ 51 S214T) ..... 14
- **Figures S6:** B-Factor maps per residue on MD complexes for CtAra $\beta$ 51 WT and MYC80 [D327N] - Gal $\beta$  interacting with Man $\alpha$ -pNP according to its initial (1 $\rightarrow$ X)-orientation (X = 3, 6, 4; enzyme = CtAra $\beta$ 51 WT, MYC80 [D327N]). ..... 20

## Supplementary Experimental parts:

- **SE1: Synthesis of the pre-screen donor substrate 5-bromo-indolyl  $\beta$ -D-galactofuranoside (5-BI-Galf)** (adapted from Berlin *et al.*<sup>16</sup>)..... 26
- **SE2: G(1→X)M disaccharide characterizations.** ..... 27

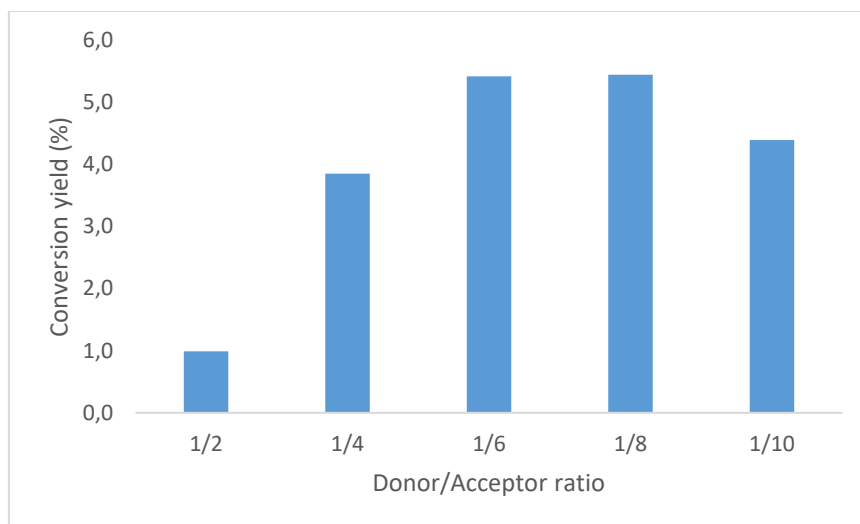

**Figure S1:** Transglycosylation between Gal $\beta$ -octyl (10 mM) and Man $\alpha$ -pNP (20-100 mM) with different donor/acceptor ratios catalyzed by CtAra $\beta$ 51 WT at 60°C. The conversion yield is based on the sum of the four G(1 $\rightarrow$ X)M disaccharides after 2 hours of reaction.

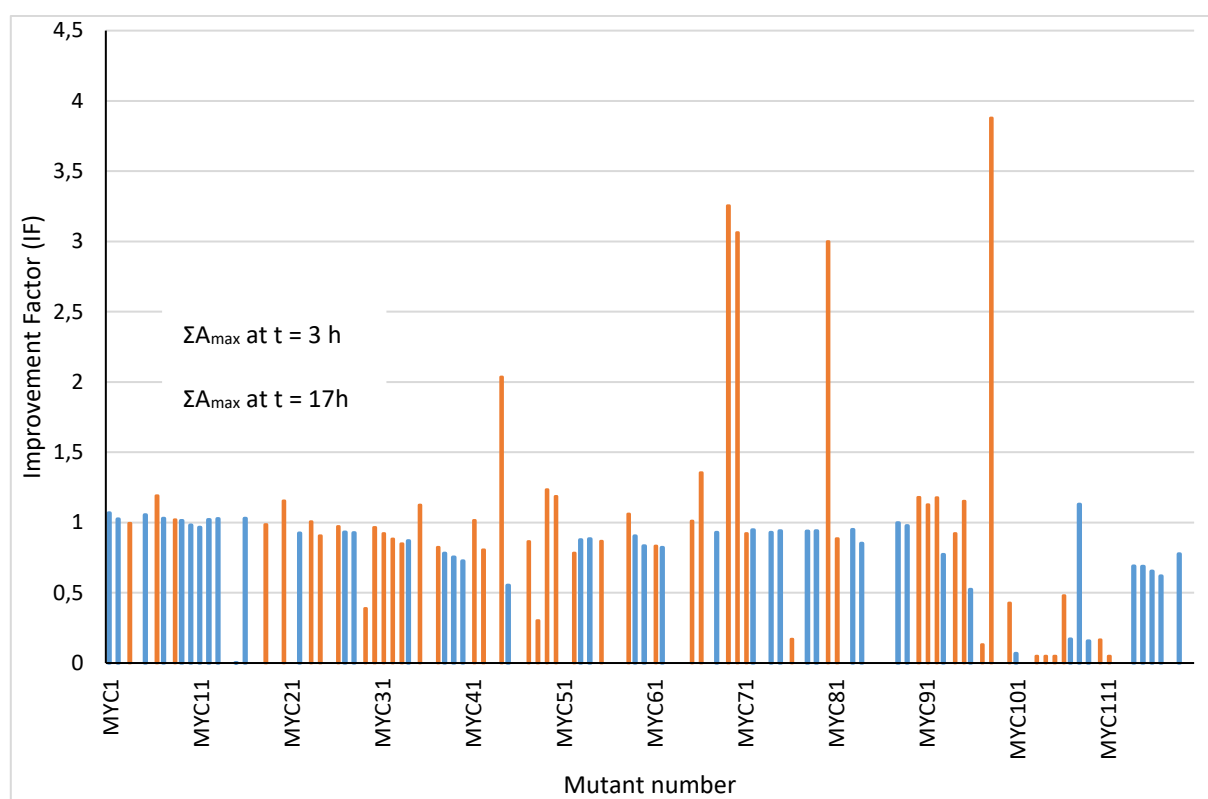

**Figure S2:** Transglycosylation improvement factors of the 120 screened mutants. The IFs were calculated according to the Equation 1.

| Enzyme                       | Initial <i>p</i> NP-Manp orientation toward GalF-enzyme | MD complexes           | Distances* (a,b) <sub>3</sub> OH |                    | Distances (a,b) <sub>4</sub> OH |                    | Distances (a,b) <sub>6</sub> OH |                    | Angles $\alpha_3$ ( <sub>3</sub> OH), $\alpha_4$ ( <sub>4</sub> OH), $\alpha_6$ ( <sub>6</sub> OH) |                |                |
|------------------------------|---------------------------------------------------------|------------------------|----------------------------------|--------------------|---------------------------------|--------------------|---------------------------------|--------------------|----------------------------------------------------------------------------------------------------|----------------|----------------|
|                              |                                                         |                        | a <sub>3</sub> (Å)               | b <sub>3</sub> (Å) | a <sub>4</sub> (Å)              | b <sub>4</sub> (Å) | a <sub>6</sub> (Å)              | b <sub>6</sub> (Å) | $\alpha_3$ (°)                                                                                     | $\alpha_4$ (°) | $\alpha_6$ (°) |
| <i>CtAra</i> /51 WT          | <sub>3</sub> OH                                         | Highest binding energy | 5.6                              | 6.3                | 8.1                             | 7.2                | 9.1                             | 7.4                | 148                                                                                                | --             | --**           |
|                              |                                                         | Final complex          | 7.4                              | 6.9                | 9.1                             | 7.9                | 8.0                             | 6.7                | 157                                                                                                | --             | --             |
|                              | <sub>4</sub> OH                                         | Highest binding energy | 6.1                              | 5.0                | 6.7                             | 7.2                | 9.2                             | 11.2               | 136                                                                                                | 124            | --             |
|                              |                                                         | Final complex          | 4.9                              | 8.3                | 6.2                             | 7.4                | 10.5                            | 11.7               | 125                                                                                                | 103            | --             |
|                              | <sub>6</sub> OH                                         | Highest binding energy | 7.7                              | 7.5                | 5.3                             | 7.1                | 3.3                             | 1.6                | --                                                                                                 | 111            | 139            |
|                              |                                                         | Final complex          | 7.3                              | 7.5                | 5.2                             | 7.2                | 3.5                             | 1.7                | --                                                                                                 | 115            | 129            |
| <i>CtAra</i> /51 S214T       | <sub>3</sub> OH                                         | Highest binding energy | 4.2                              | 6.5                | 7.0                             | 8.1                | 9.1                             | 9.0                | 143                                                                                                | --             | --             |
|                              |                                                         | Final complex          | 5.7                              | 7.3                | 8.1                             | 8.3                | 8.9                             | 9.2                | 157                                                                                                | --             | --             |
|                              | <sub>4</sub> OH                                         | Highest binding energy | 3.4                              | 5.6                | 3.9                             | 5.2                | 7.0                             | 8.8                | 116                                                                                                | 71             | 61             |
|                              |                                                         | Final complex          | 3.5                              | 4.0                | 4.0                             | 5.1                | 7.1                             | 9.2                | 136                                                                                                | 93             | 80             |
|                              | <sub>6</sub> OH                                         | Highest binding energy | 3.7                              | 5.6                | 3.5                             | 5.4                | 6.8                             | 9.6                | 154                                                                                                | 105            | 92             |
|                              |                                                         | Final complex          | 3.2                              | 6.7                | 3.5                             | 5.3                | 6.5                             | 9.5                | 142                                                                                                | 92             | 82             |
| <i>CtAra</i> /51 E225D       | <sub>3</sub> OH                                         | Highest binding energy | 5.4                              | 4.7                | 8.1                             | 8.7                | 9.8                             | 10.3               | 150                                                                                                | --             | --             |
|                              |                                                         | Final complex          | 5.6                              | 4.6                | 8.3                             | 8.4                | 9.7                             | 7.8                | 155                                                                                                | --             | --             |
|                              | <sub>4</sub> OH                                         | Highest binding energy | 5.4                              | 5.5                | 8.1                             | 8.5                | 9.2                             | 10.2               | 154                                                                                                | 143            | 116            |
|                              |                                                         | Final complex          | 5.5                              | 5.1                | 8.2                             | 7.9                | 9.2                             | 7.1                | 145                                                                                                | 135            | 111            |
|                              | <sub>6</sub> OH                                         | Highest binding energy | 8.3                              | 8.5                | 6.7                             | 9.2                | 3.5                             | 4.1                | 118                                                                                                | 99             | 91             |
|                              |                                                         | Final complex          | 8.9                              | 9.9                | 6.8                             | 9.4                | 4.9                             | 4.3                | 105                                                                                                | 90             | 101            |
| <i>CtAra</i> /51 S214T E225D | <sub>3</sub> OH                                         | Highest binding energy | 4.6                              | 4.9                | 7.2                             | 7.2                | 8.6                             | 7.9                | 155                                                                                                | --             | --             |
|                              |                                                         | Final complex          | 4.7                              | 5.0                | 7.5                             | 7.5                | 9.5                             | 9.9                | 153                                                                                                | --             | --             |
|                              | <sub>4</sub> OH                                         | Highest binding energy | 3.6                              | 4.5                | 3.5                             | 4.3                | 7.2                             | 8.7                | 139                                                                                                | 93             | 84             |
|                              |                                                         | Final complex          | 4.9                              | 5.8                | 4.2                             | 4.4                | 7.9                             | 9.4                | 130                                                                                                | 96             | 82             |
|                              | <sub>6</sub> OH                                         | Highest binding energy | 7.8                              | 8.3                | 9.1                             | 8.3                | 7.6                             | 5.1                | 152                                                                                                | 146            | 125            |
|                              |                                                         | Final complex          | 8.1                              | 9.3                | 9.4                             | 9.3                | 7.9                             | 4.9                | 140                                                                                                | 133            | 121            |
| <i>CtAra</i> /51 D327N       | <sub>3</sub> OH                                         | Highest binding energy | 3.9                              | 4.9                | 7.0                             | 7.9                | 9.7                             | 9.0                | 134                                                                                                | 109            | --             |
|                              |                                                         | Final complex          | 6.8                              | 6.2                | 4.1                             | 5.3                | 5.9                             | 8.1                | 101                                                                                                | 108            | --             |
|                              | <sub>4</sub> OH                                         | Highest binding energy | 6.1                              | 7.7                | 3.3                             | 6.9                | 4.1                             | 3.0                | 94                                                                                                 | 91             | 149            |
|                              |                                                         | Final complex          | 6.0                              | 7.8                | 3.2                             | 6.9                | 4.1                             | 1.7                | 104                                                                                                | 96             | 136            |
|                              | <sub>6</sub> OH                                         | Highest binding energy | 3.8                              | 5.4                | 3.3                             | 5.1                | 6.6                             | 8.8                | 140                                                                                                | 94             | --             |
|                              |                                                         | Final complex          | 4.0                              | 5.6                | 3.5                             | 5.3                | 7.2                             | 9.1                | 141                                                                                                | 93             | --             |

**Table S1:** Parameters a<sub>x</sub>, b<sub>x</sub> and  $\alpha_x$  of MD complexes to study Manp-*p*NP orientations approaching GalF-enzyme intermediates.

\* See scheme 3 for distances and angle representations; \*\*(--): atoms were too far, angle  $\alpha_x$  has no meaning.

The figures S3 were divided in five parts A<sub>i</sub> to E<sub>i</sub> corresponding to each enzyme or mutant, (A<sub>i</sub>): *CtAraf51* WT, (B<sub>i</sub>): *CtAraf51* S214T, (C<sub>i</sub>): *CtAraf51* S214T E225D, (D<sub>i</sub>): *CtAraf51* E225D, (E<sub>i</sub>): *CtAraf51* D327N. For each of them, the three (i) starting (1→X)-orientations from Manp-*p*NP approaches were considered (X = 3, 4, 6).

### A1 *CtAraf51* Wild type / (1→3)

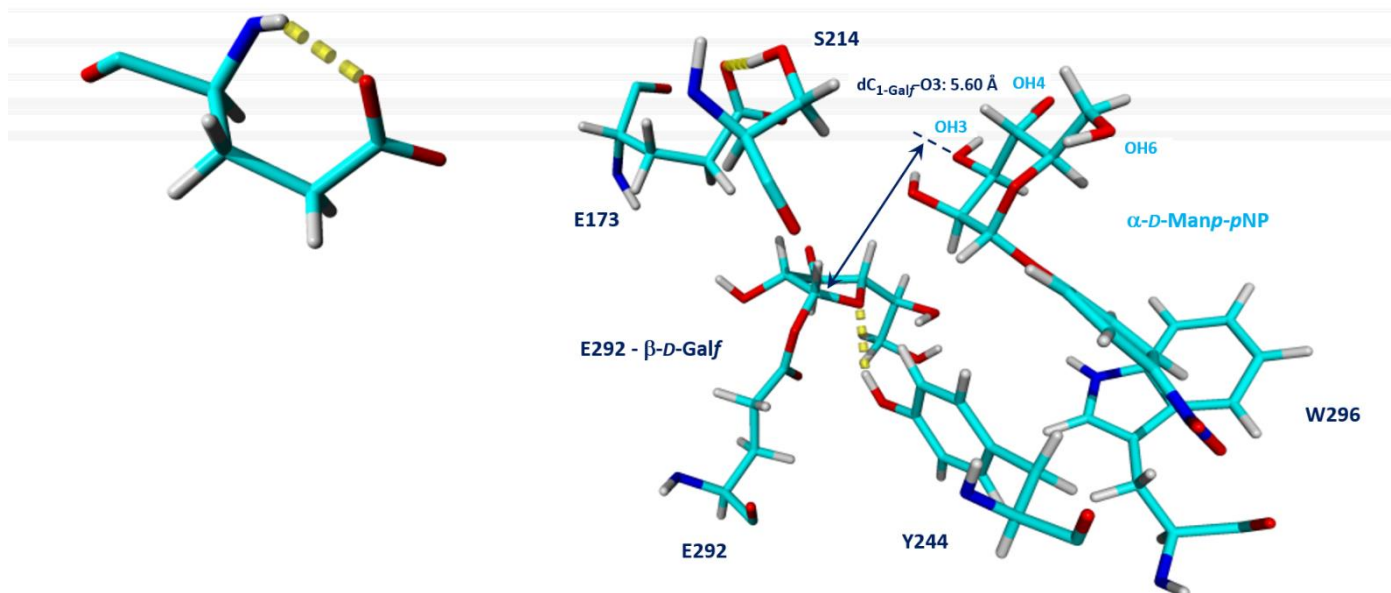

### A2 *CtAraf51* Wild type / (1→4)

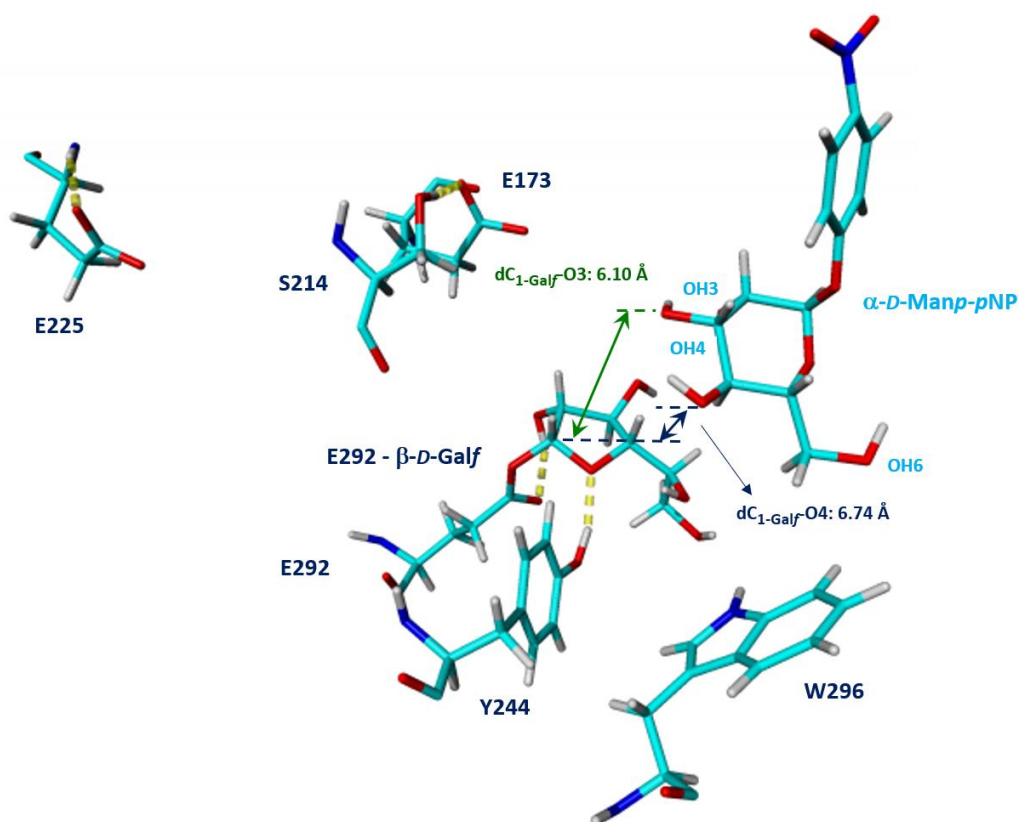

../...

### A3 *CtAraf51* Wild type / (1→6)

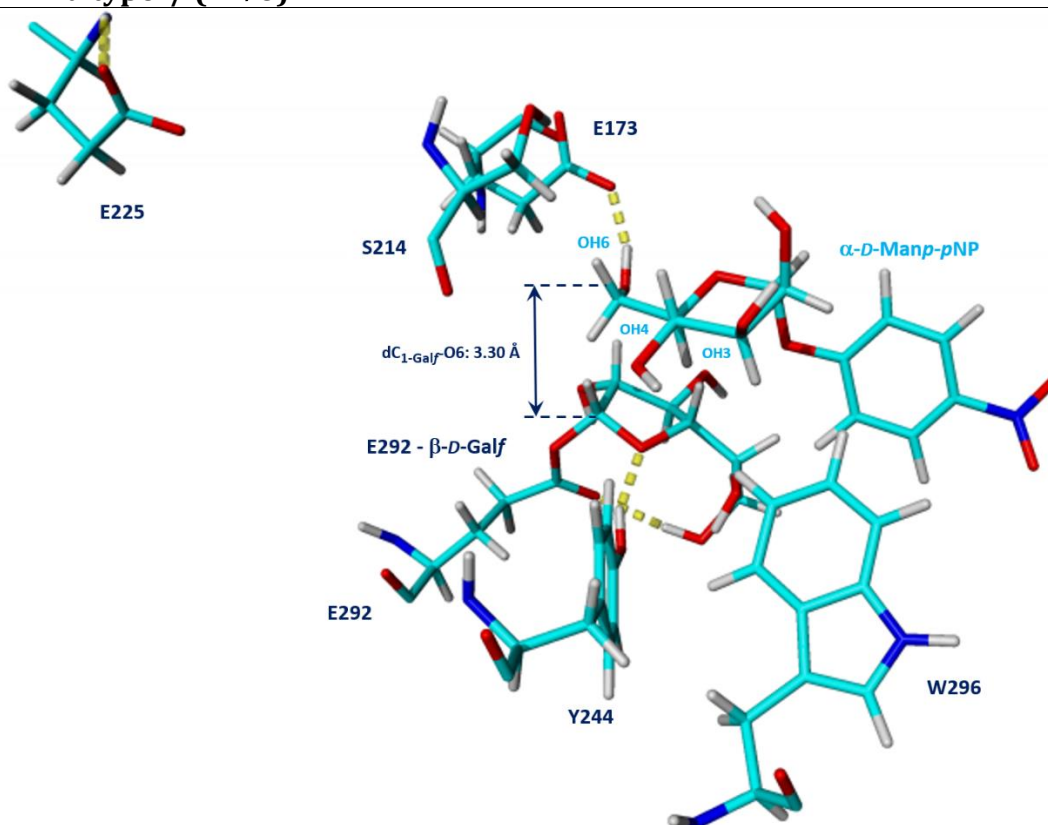

**Figure S3(A1, A2, A3):** *CtAraf51* WT-Galf intermediate interacting with Manp-pNP after MD starting from the different (1→X)-oriented Manp-pNP (X = 3, 4, 6).

### B1 *CtAraf51* S214T / (1→3)

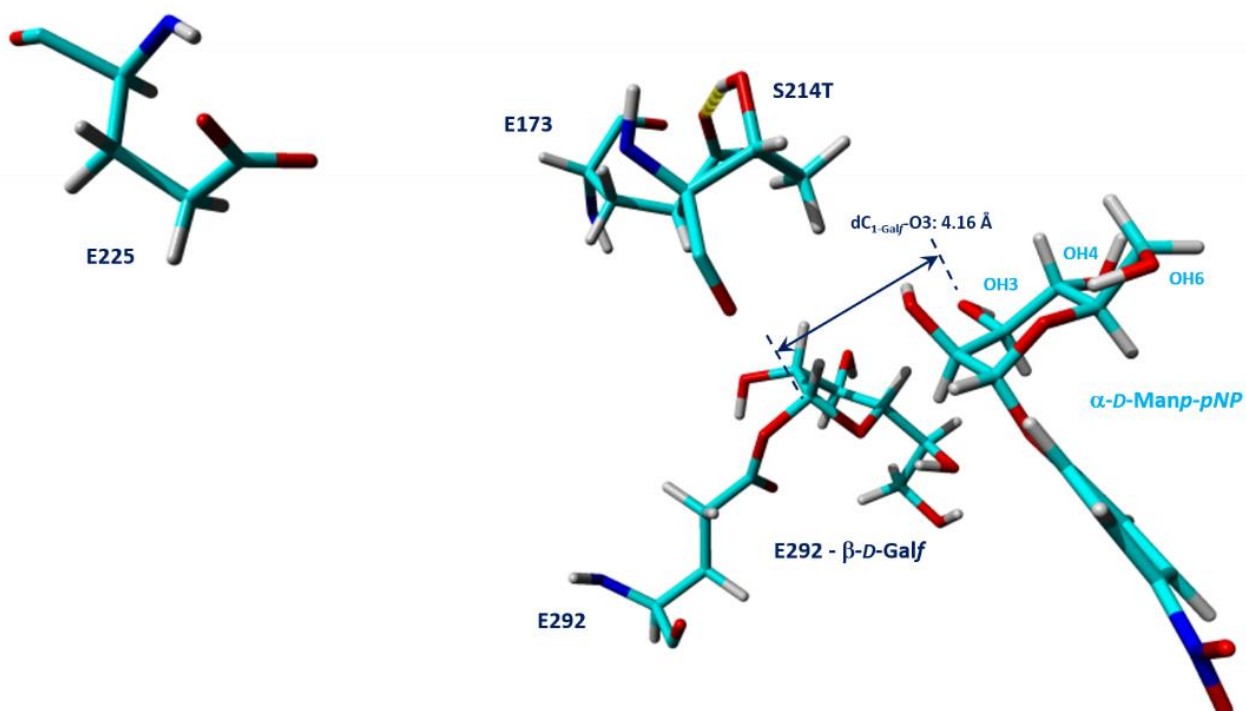

../...

**B2** *CtAraf51* S214T / (1→4)

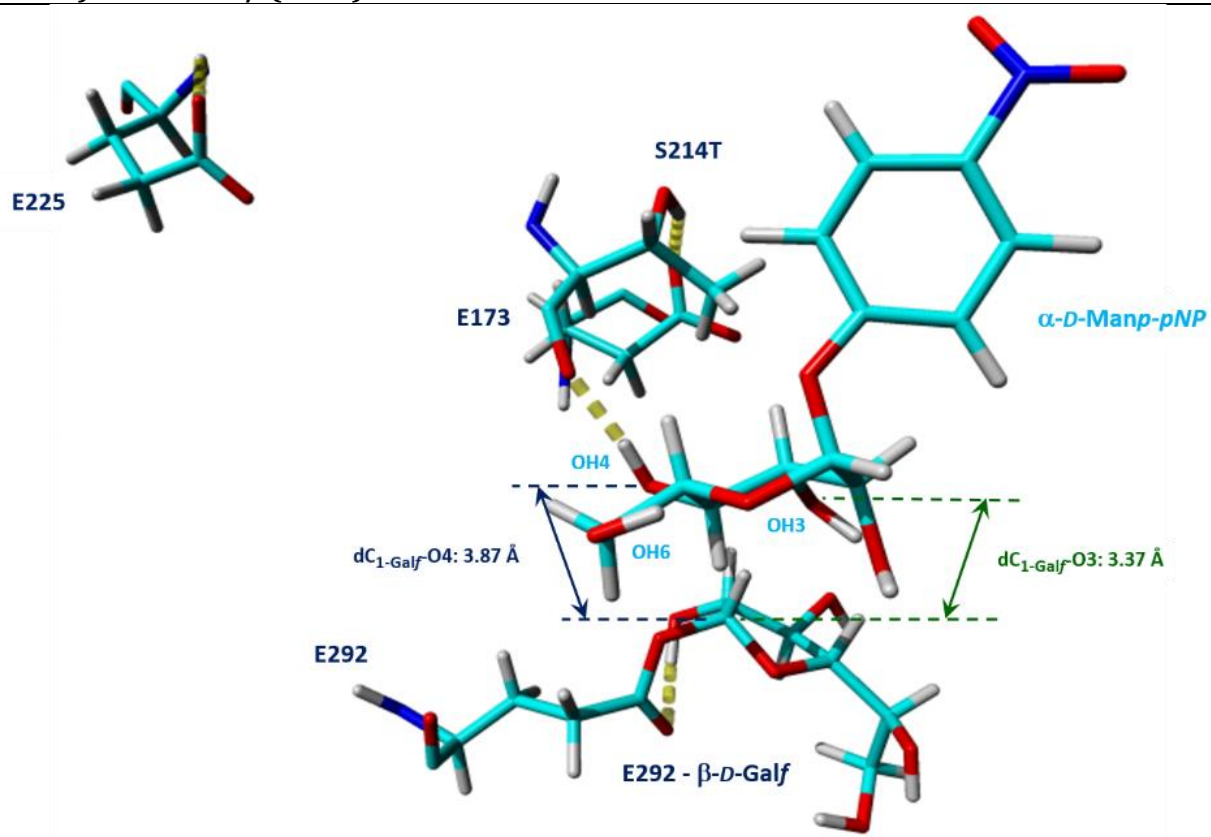

**B3** *CtAraf51* S214T / (1→6)

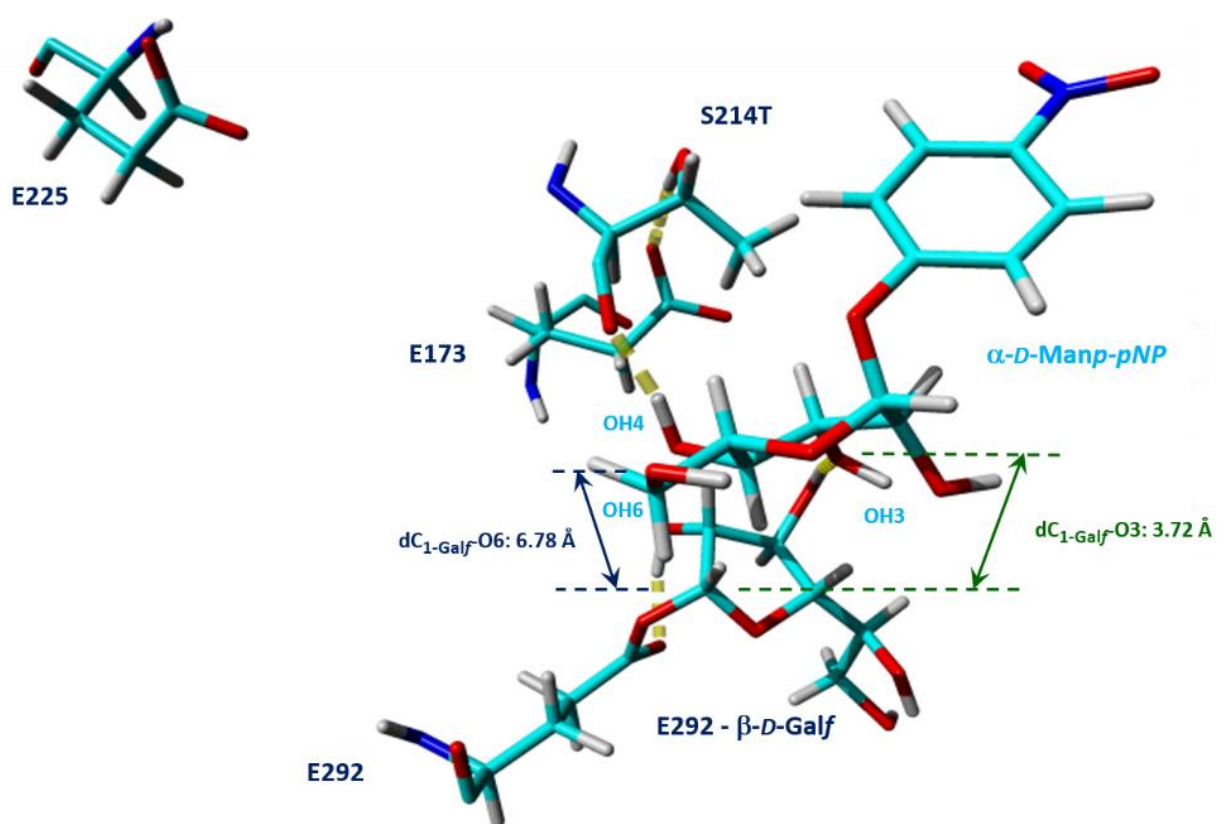

**Figure S3(B1, B2, B3):** *CtAraf51* S214T-Galf intermediate interacting with Manp-pNP after MD starting from the different (1→X)-oriented Manp-pNP (X = 3, 4, 6).

C1 *CtAra51* S214T E225D / (1→3)

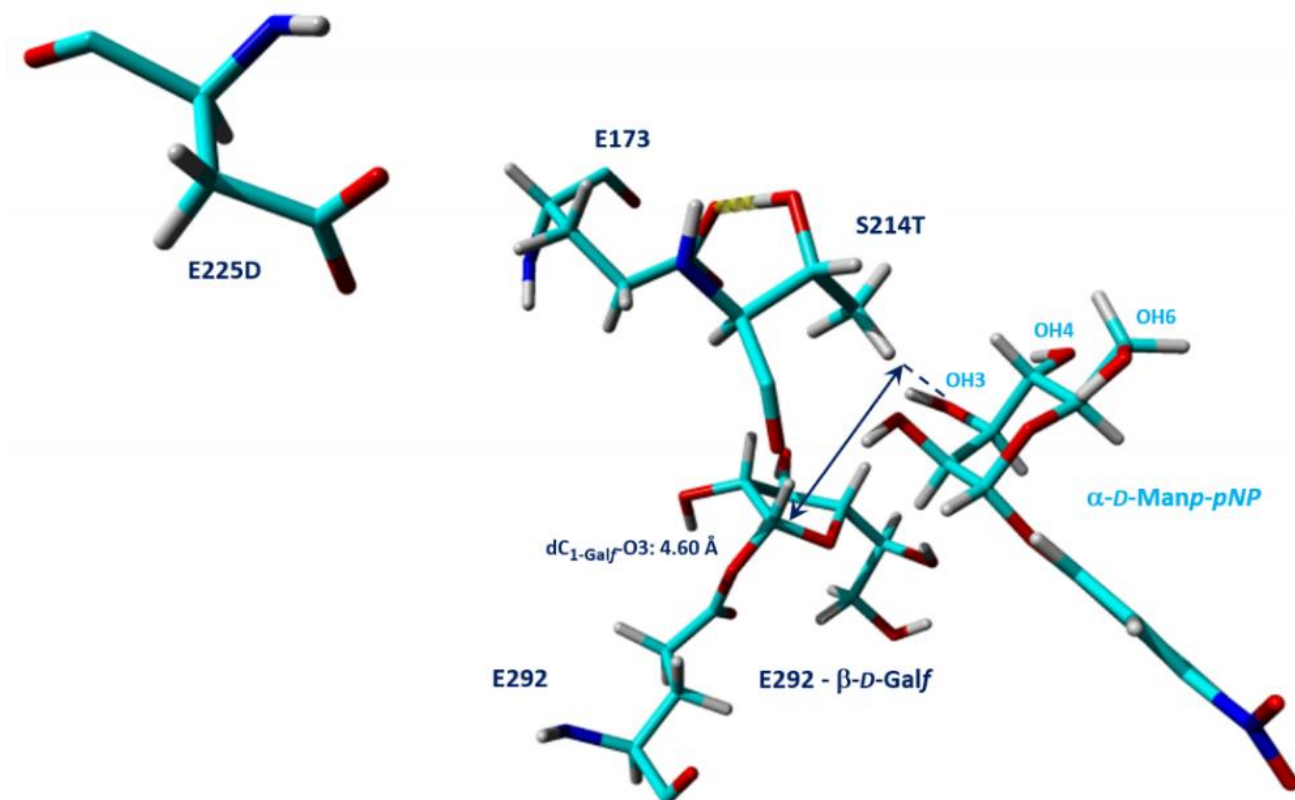

C2 *CtAra51* S214T E225D / (1→4)

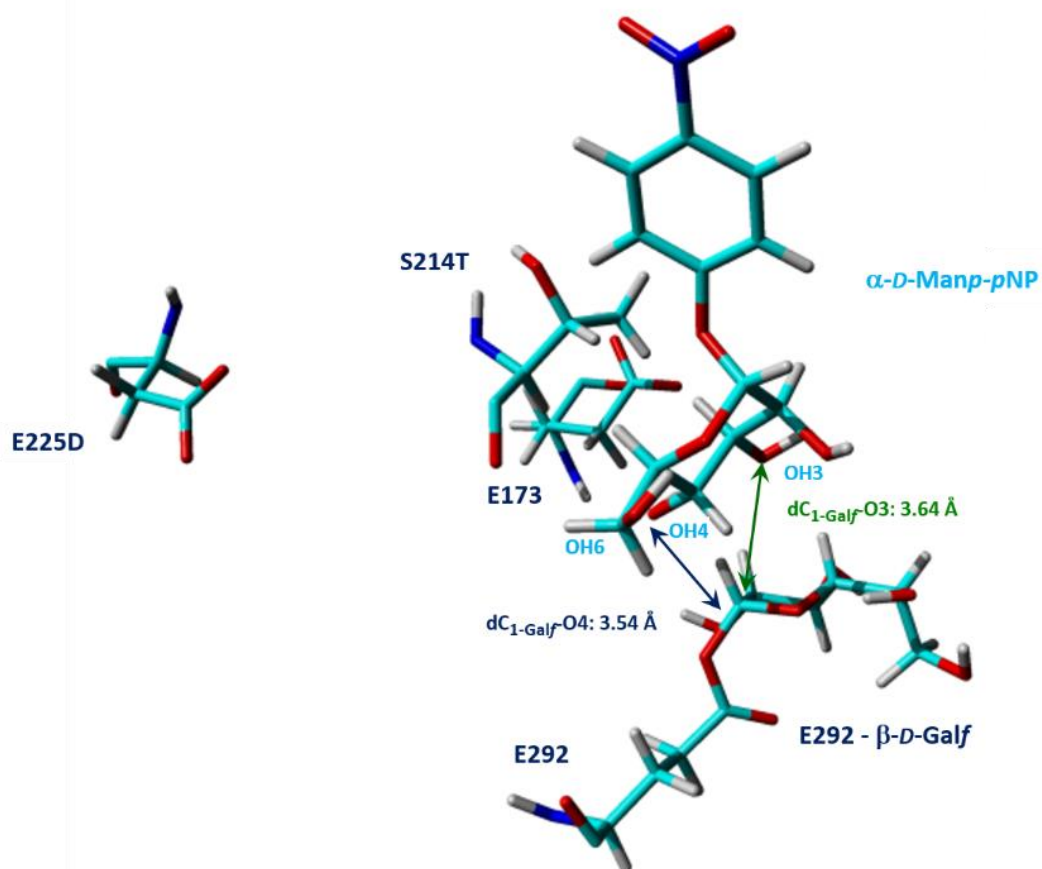

../...

### C3 *CtAraF51* S214T E225D / (1→6)

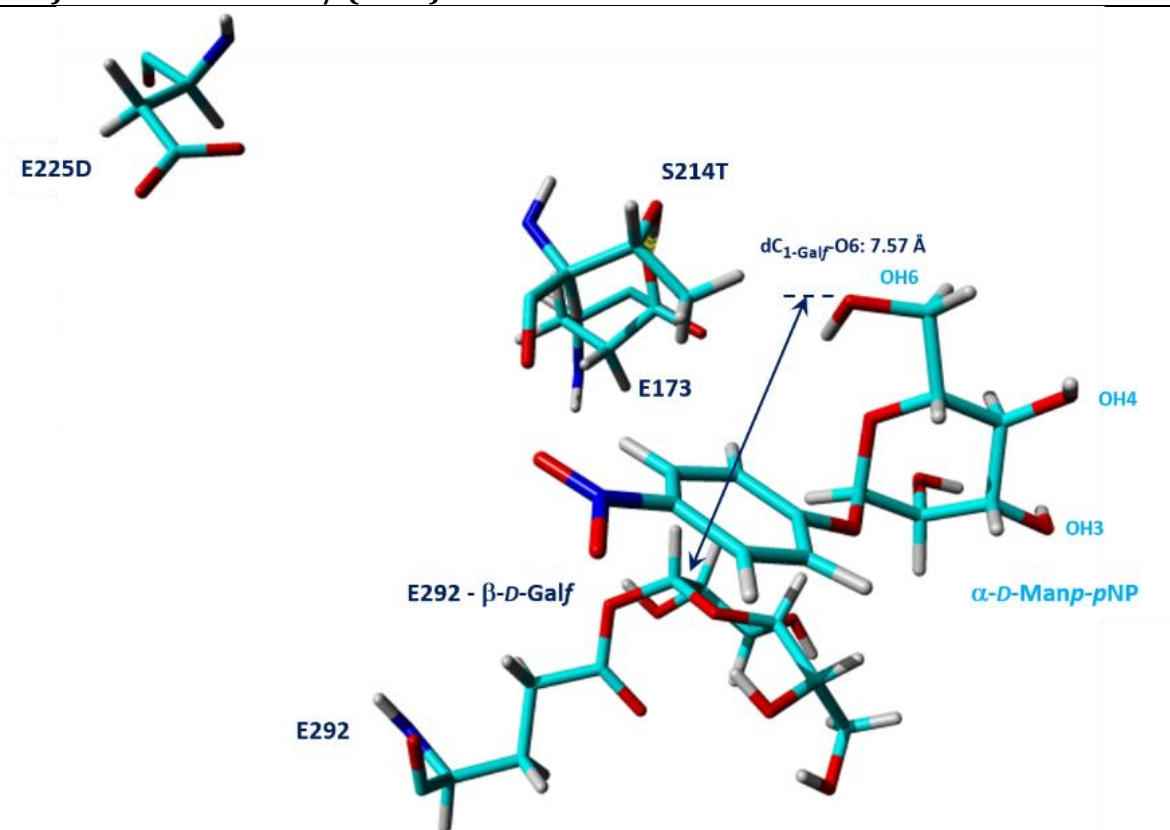

**Figure S3(C1, C2, C3):** *CtAraF51* S214T E225D-Galf intermediate interacting with Manp-pNP after MD starting from the different (1→X)-oriented Manp-pNP (X = 3, 6, 4).

### D1 *CtAraF51* E225D / (1→3)

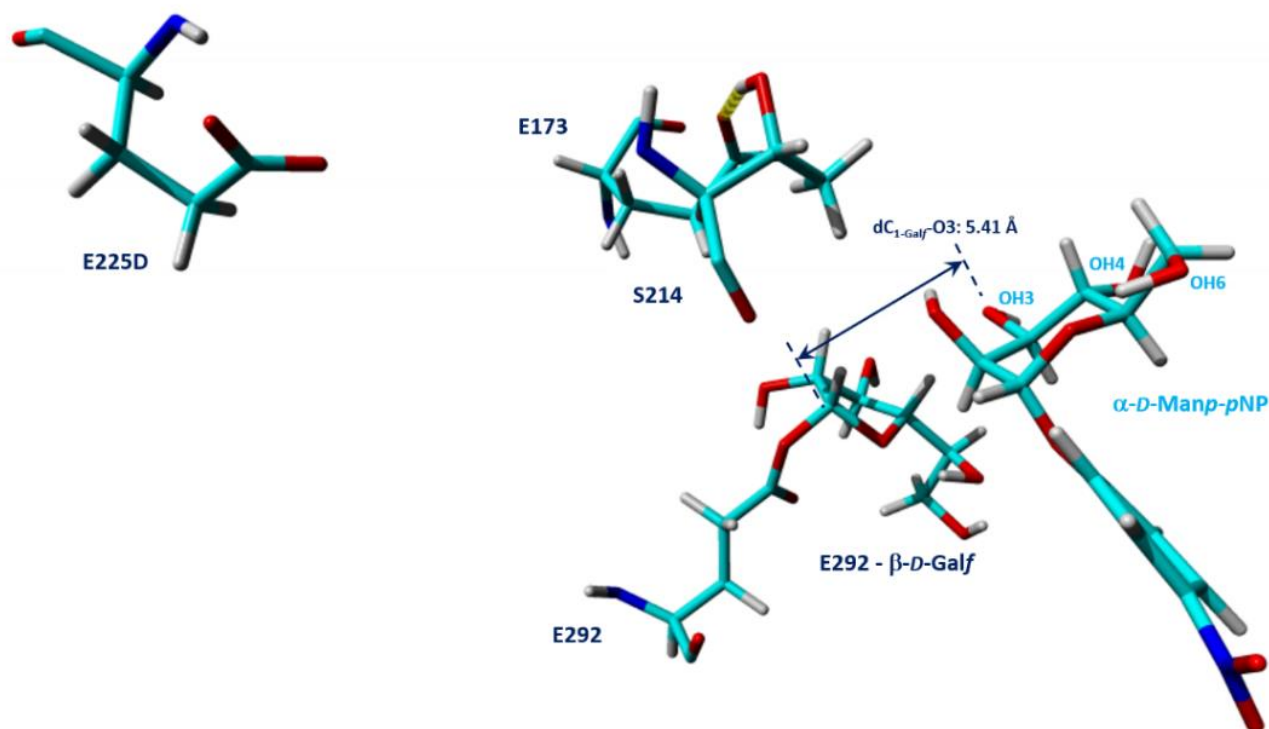

../...

D2 *CtAraf51* E225D / (1→4)

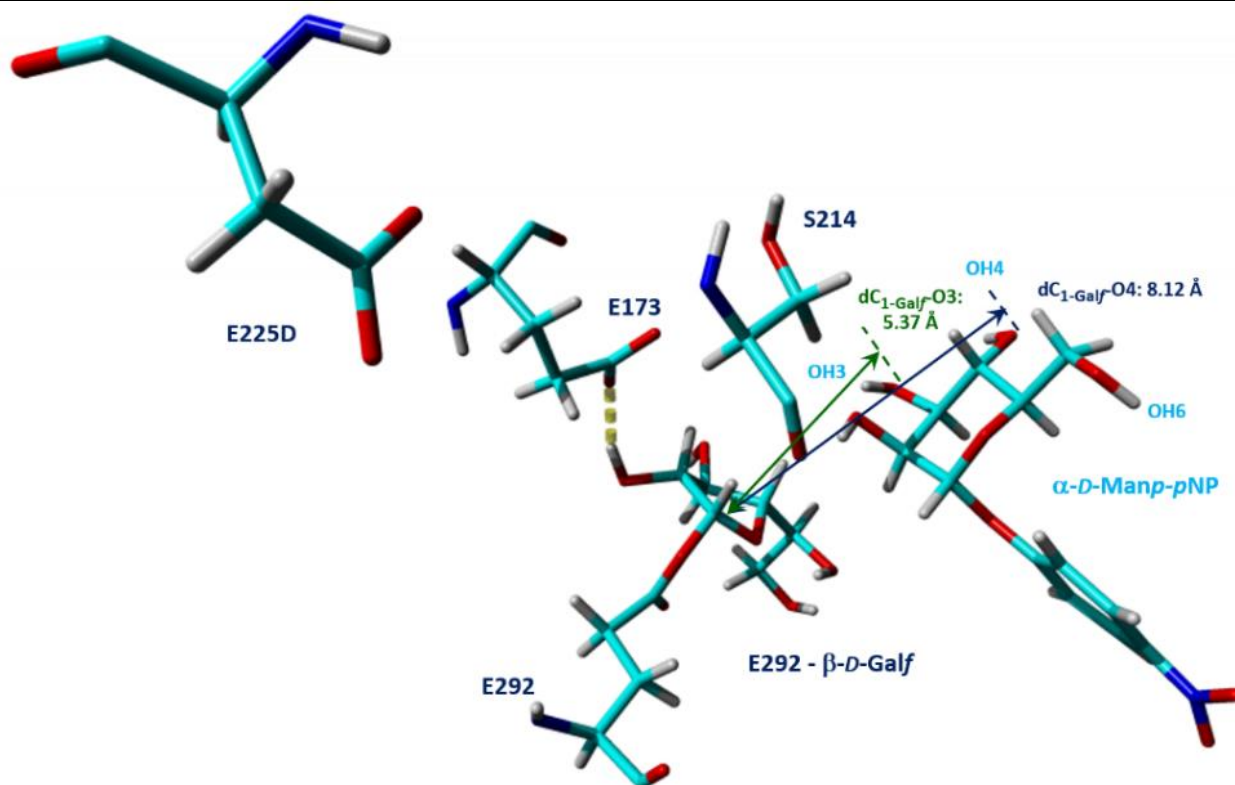

D3 *CtAraf51* E225D / (1→6)

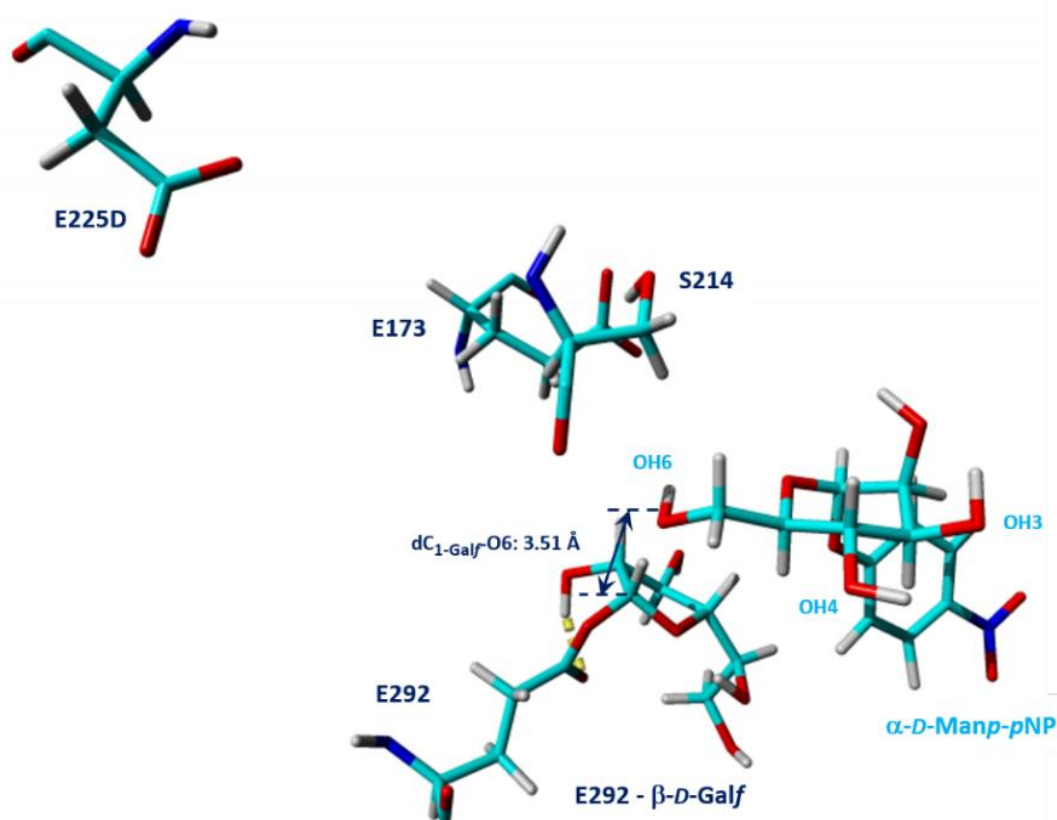

**Figure S3(D1, D2, D3):** *CtAraf51* E225D-Galf intermediate interacting with Manp-pNP after MD starting from the different (1→X)-oriented Manp-pNP (X = 3, 4, 6).

E1 *CtAraf*51 D327N / (1→3)

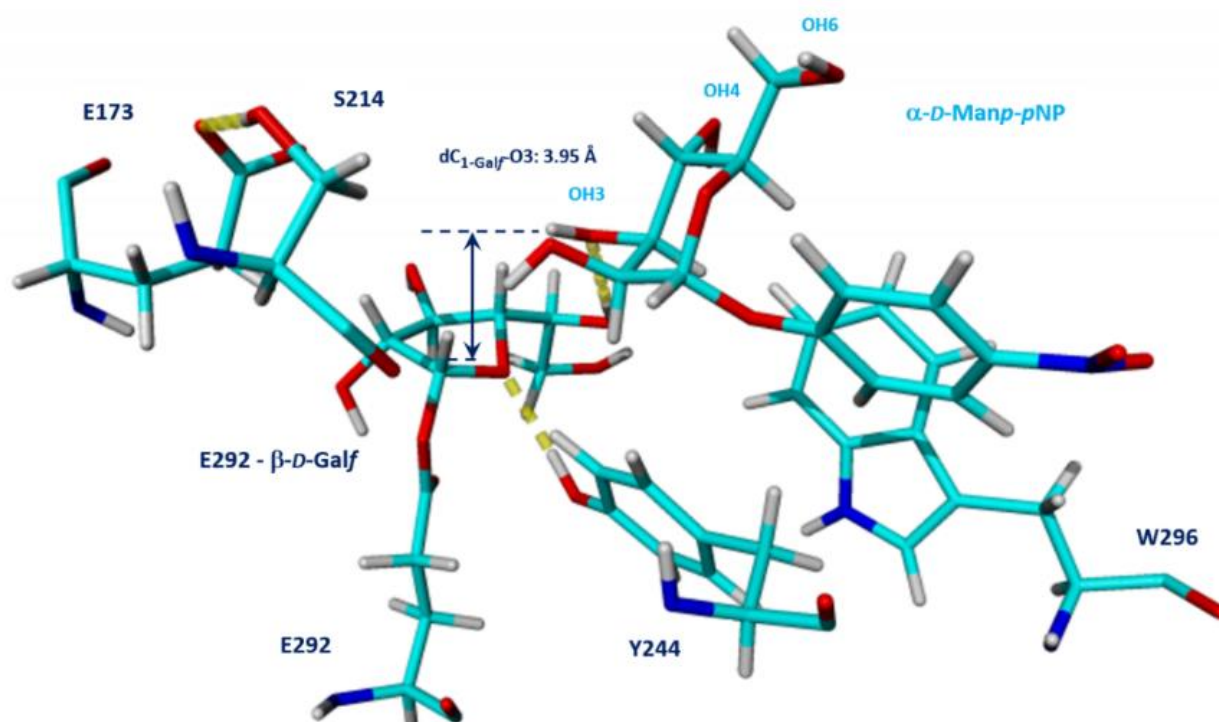

E2 *CtAraf*51 D327N / (1→4)

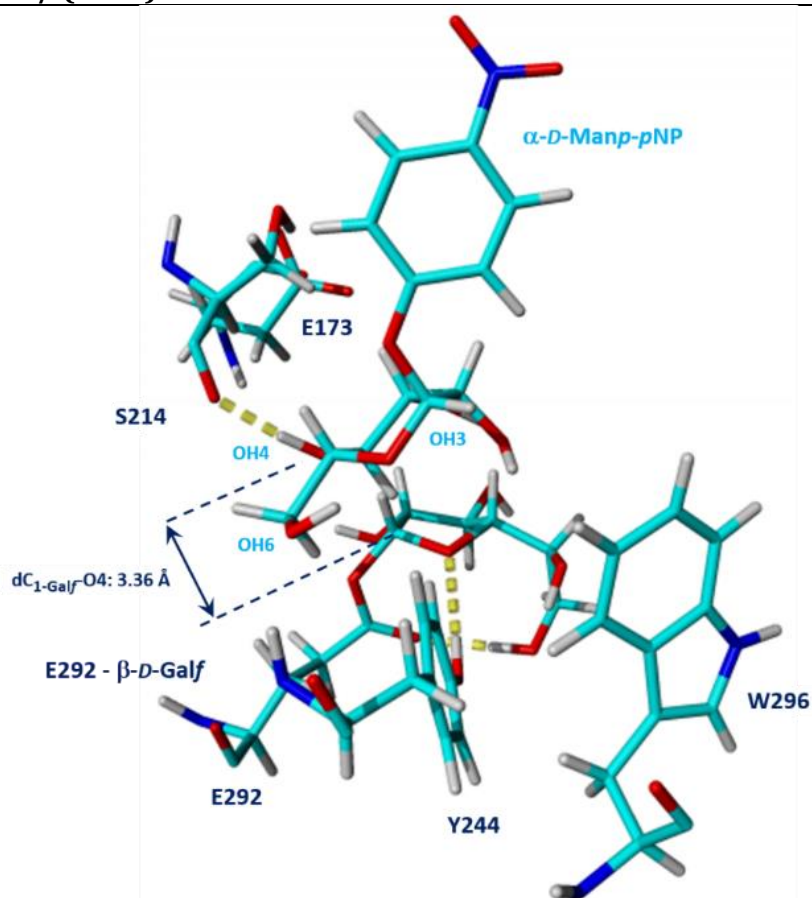

../...

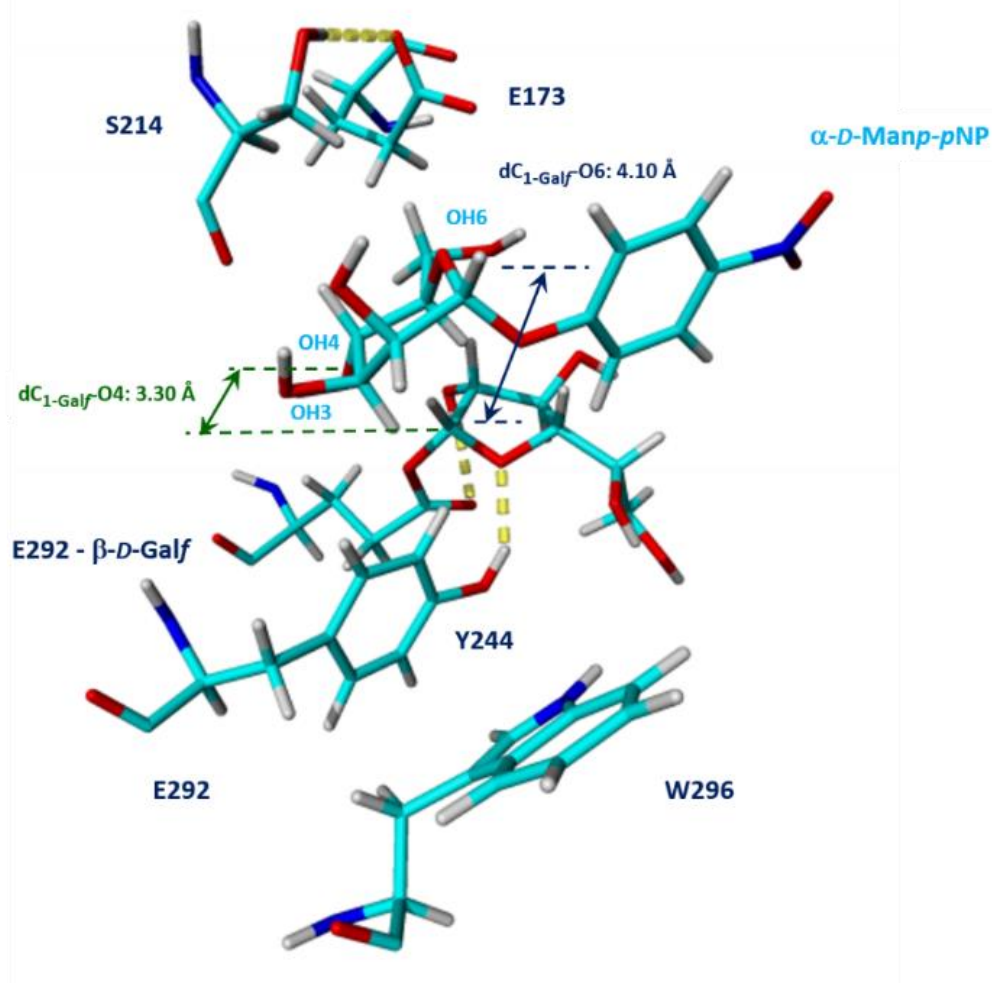

**Figure S3(E1, E2, E3):** *CtAraf51* D327N-Galf intermediate interacting with Manp-pNP after MD starting from the different (1→X)-oriented Manp-pNP (X = 3, 4, 6).

../...

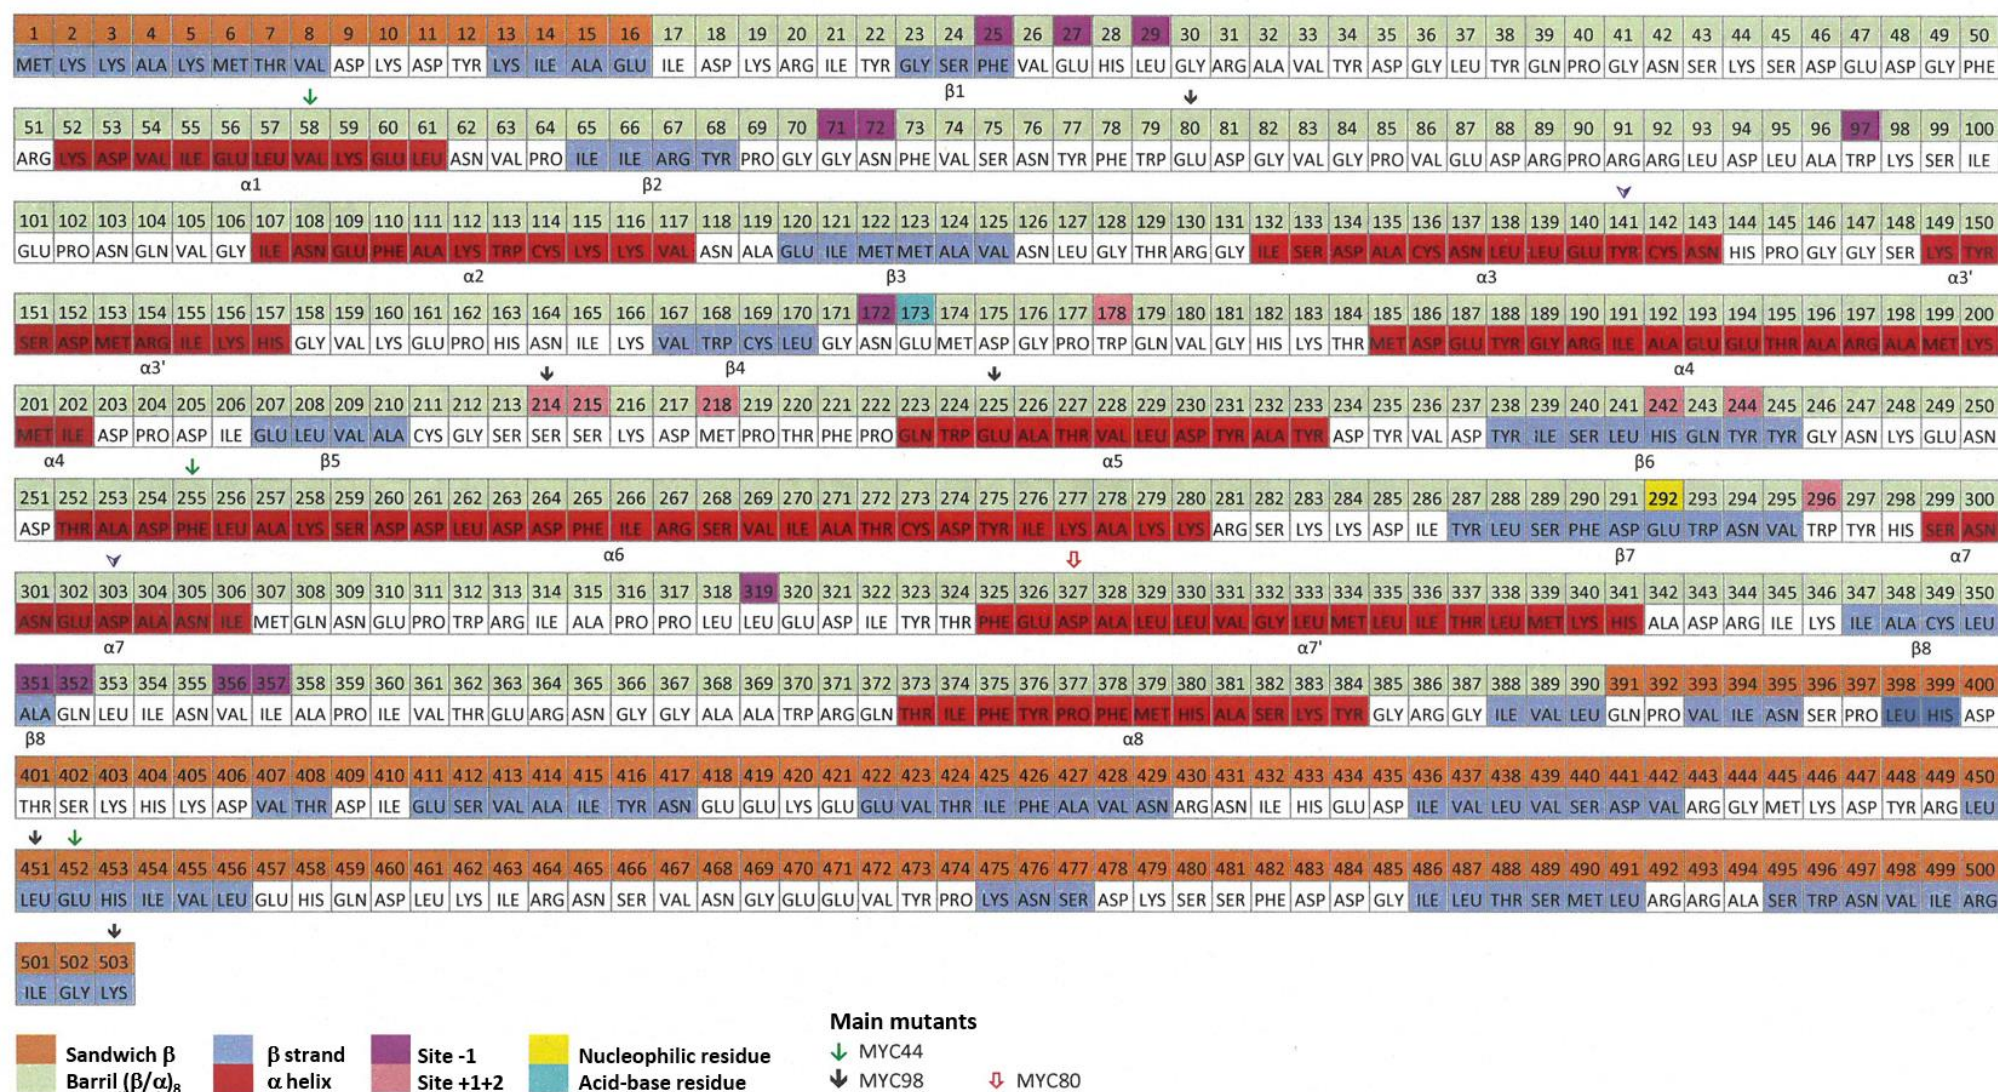

**Figure S4:** Secondary structure of *CtAraf51* wild type and selected mutants.

The figures S5 were divided in three parts (A, B, C) corresponding to each initial (1→X)-orientations from the acceptor Manp-pNP (X = 3, 4, 6) in order to compare *CtAra51* WT and *CtAra51* S214T. The scale of B factors ranges from a value 0 corresponding to blue (cool, frozen) until 70 with yellow (hot, flexible).

**A1 *CtAra51* Wild type / (1→3)**

---

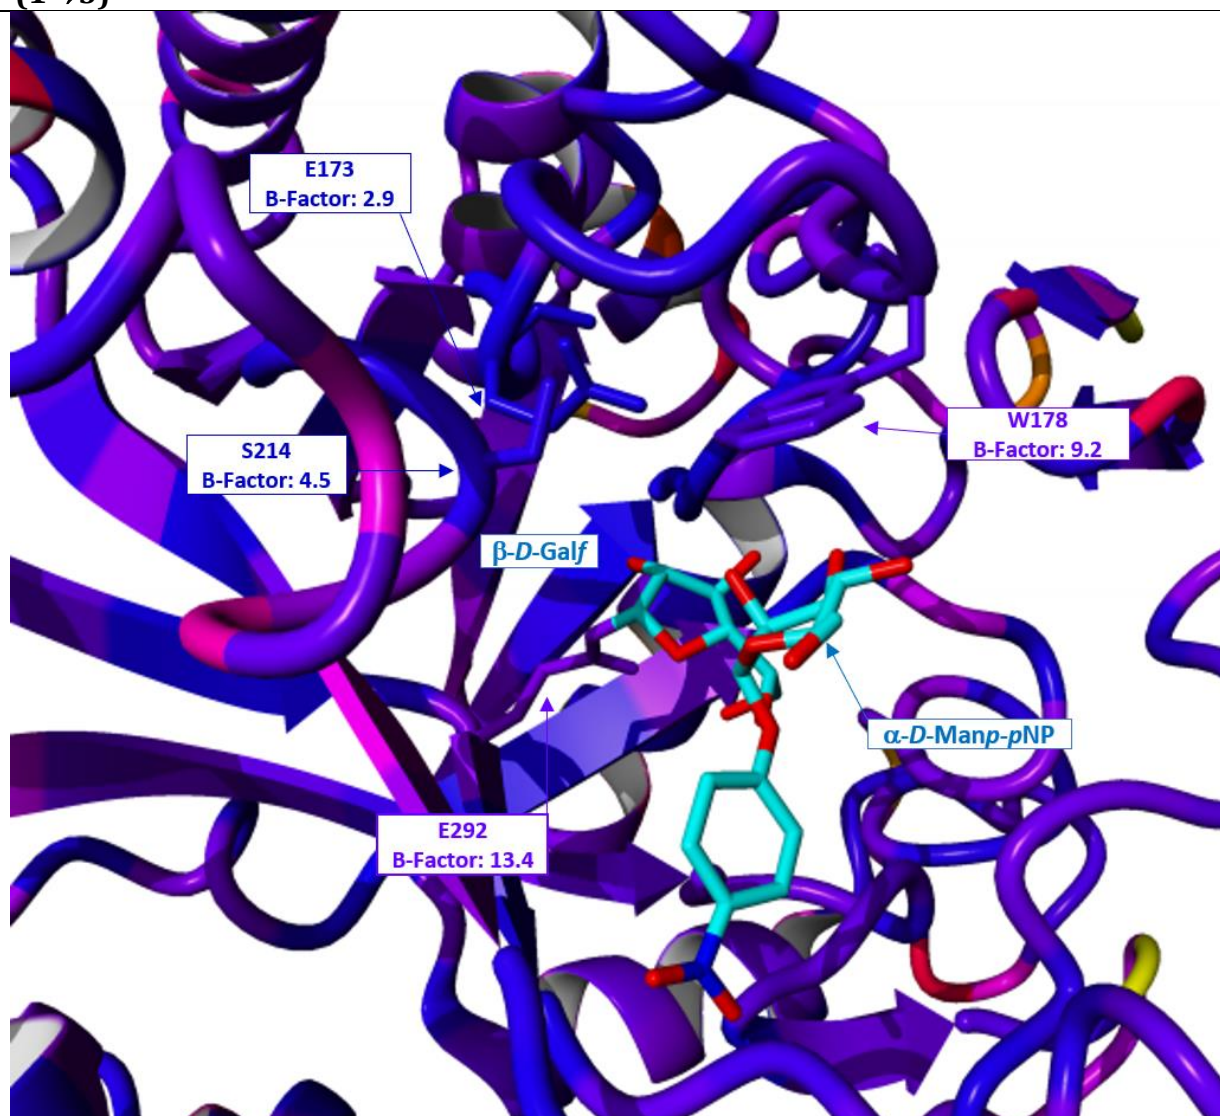

../...

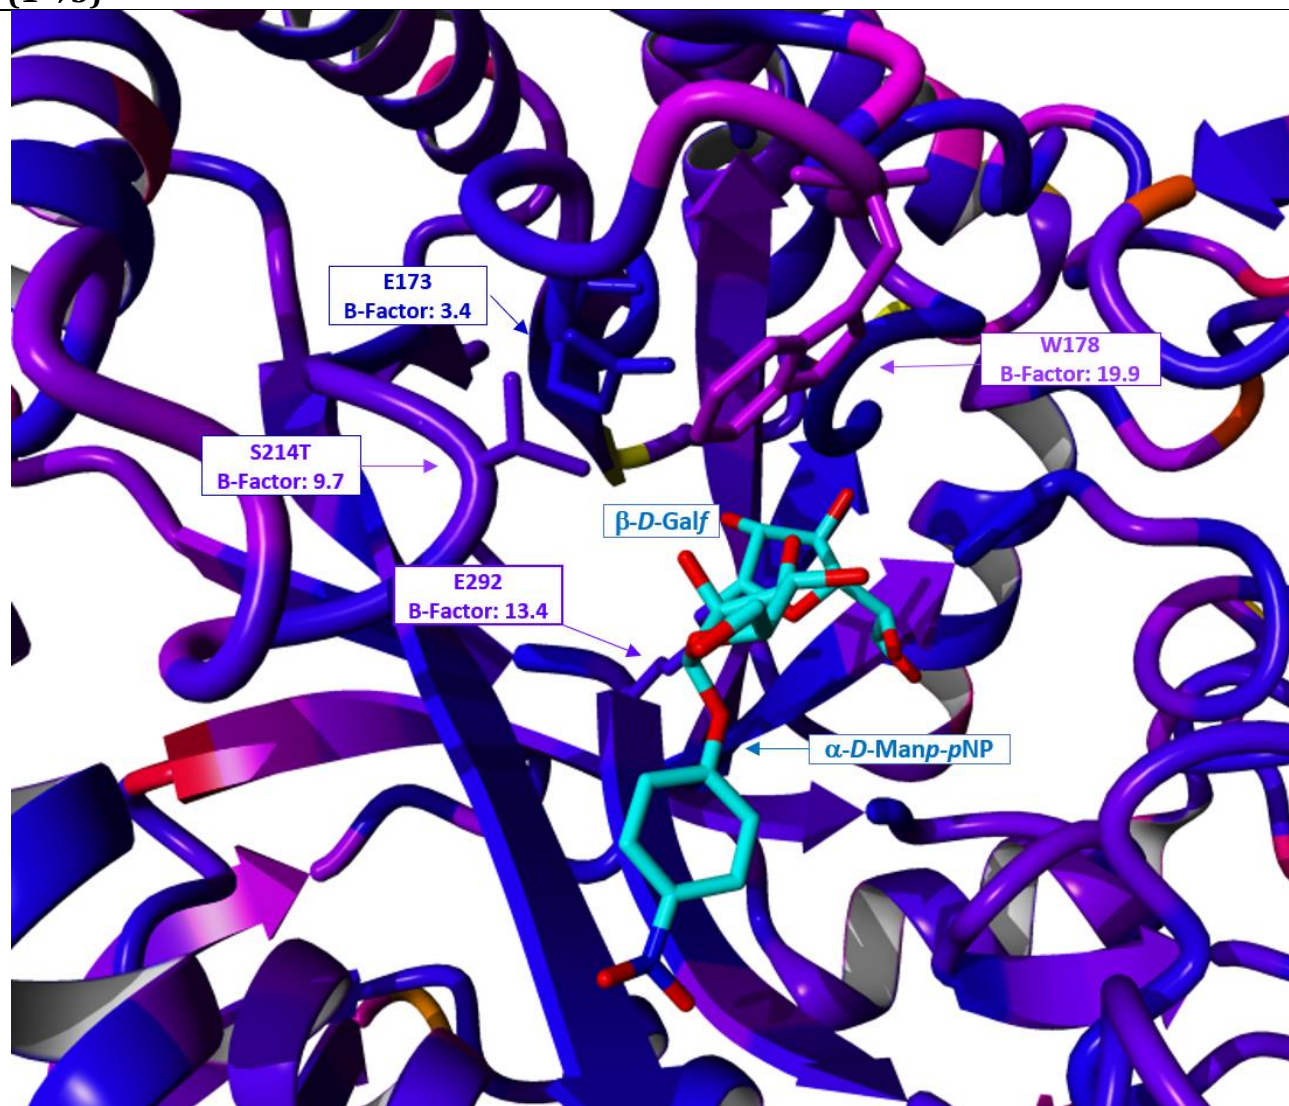

**Figure S5(A1, A2):** B-Factor maps per residue on MD complexes for *CtAraf51*WT-Galf and *CtAraf51* S214T-Galf intermediates interacting with Manp-pNP according to its initial (1→3)-orientation.

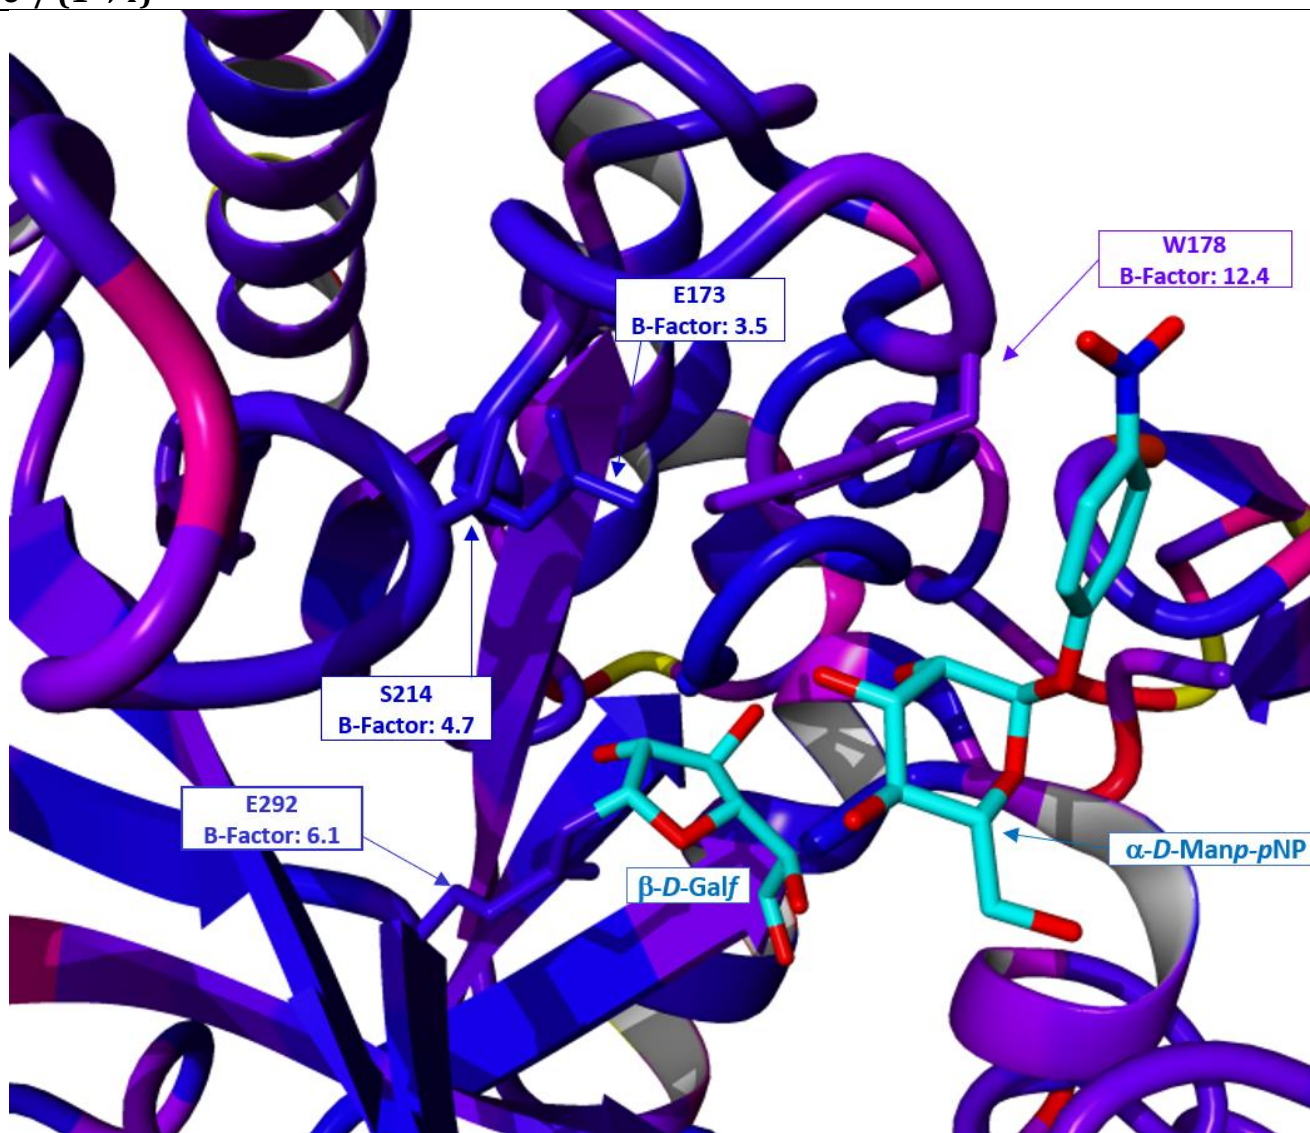

../...

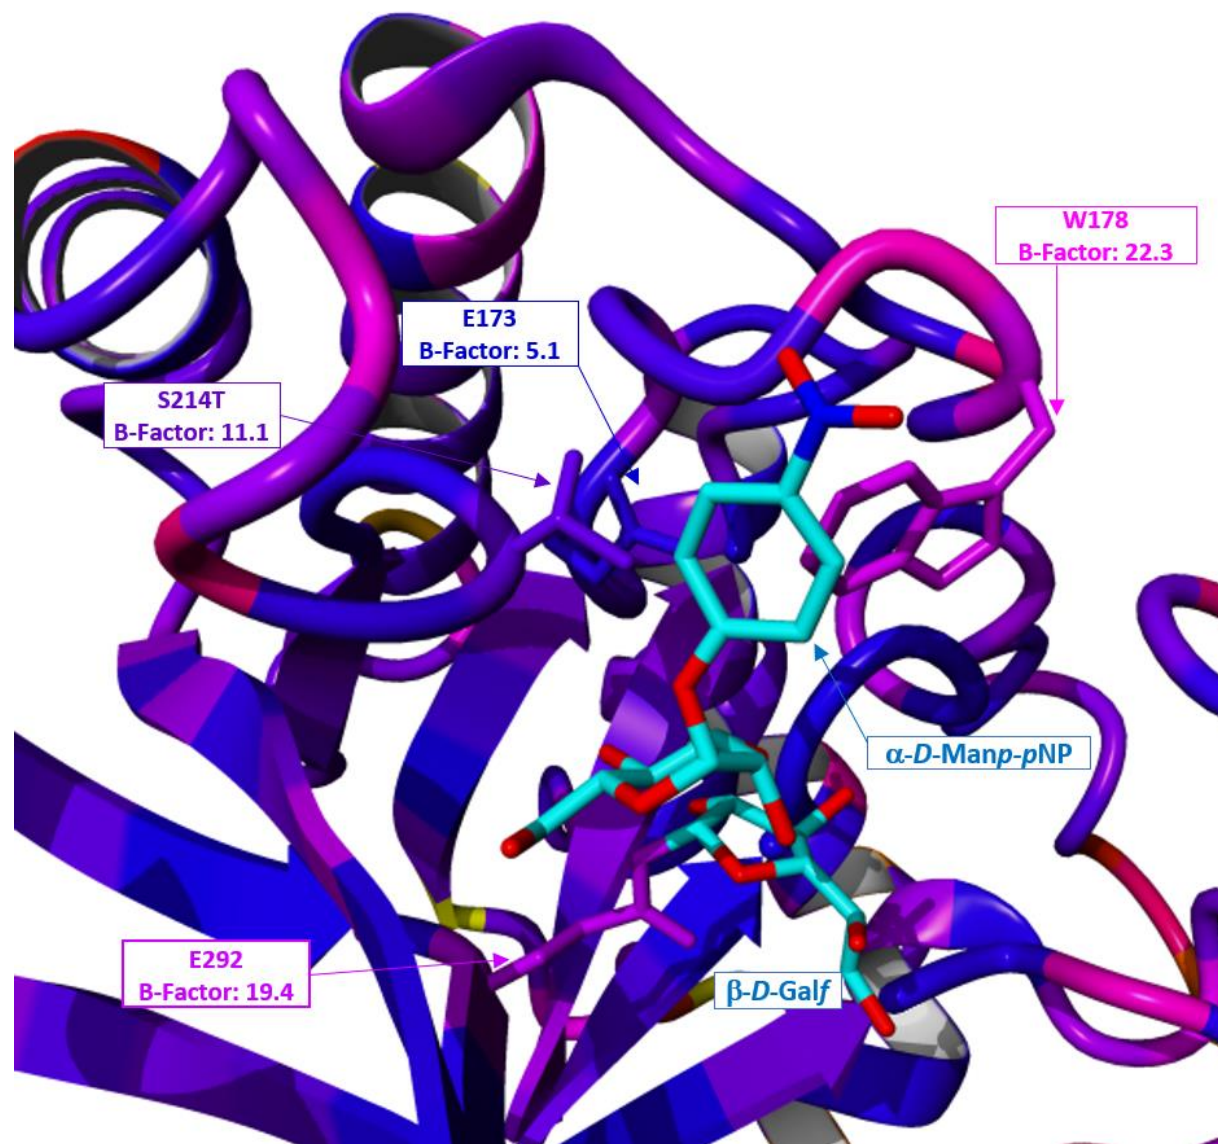

**Figure S5(B1, B2):** B-Factor maps per residue on MD complexes for *CtAraf51*WT-Galf and *CtAraf51* S214T-Galf intermediates interacting with Manp-pNP according to its initial (1→4)-orientation.

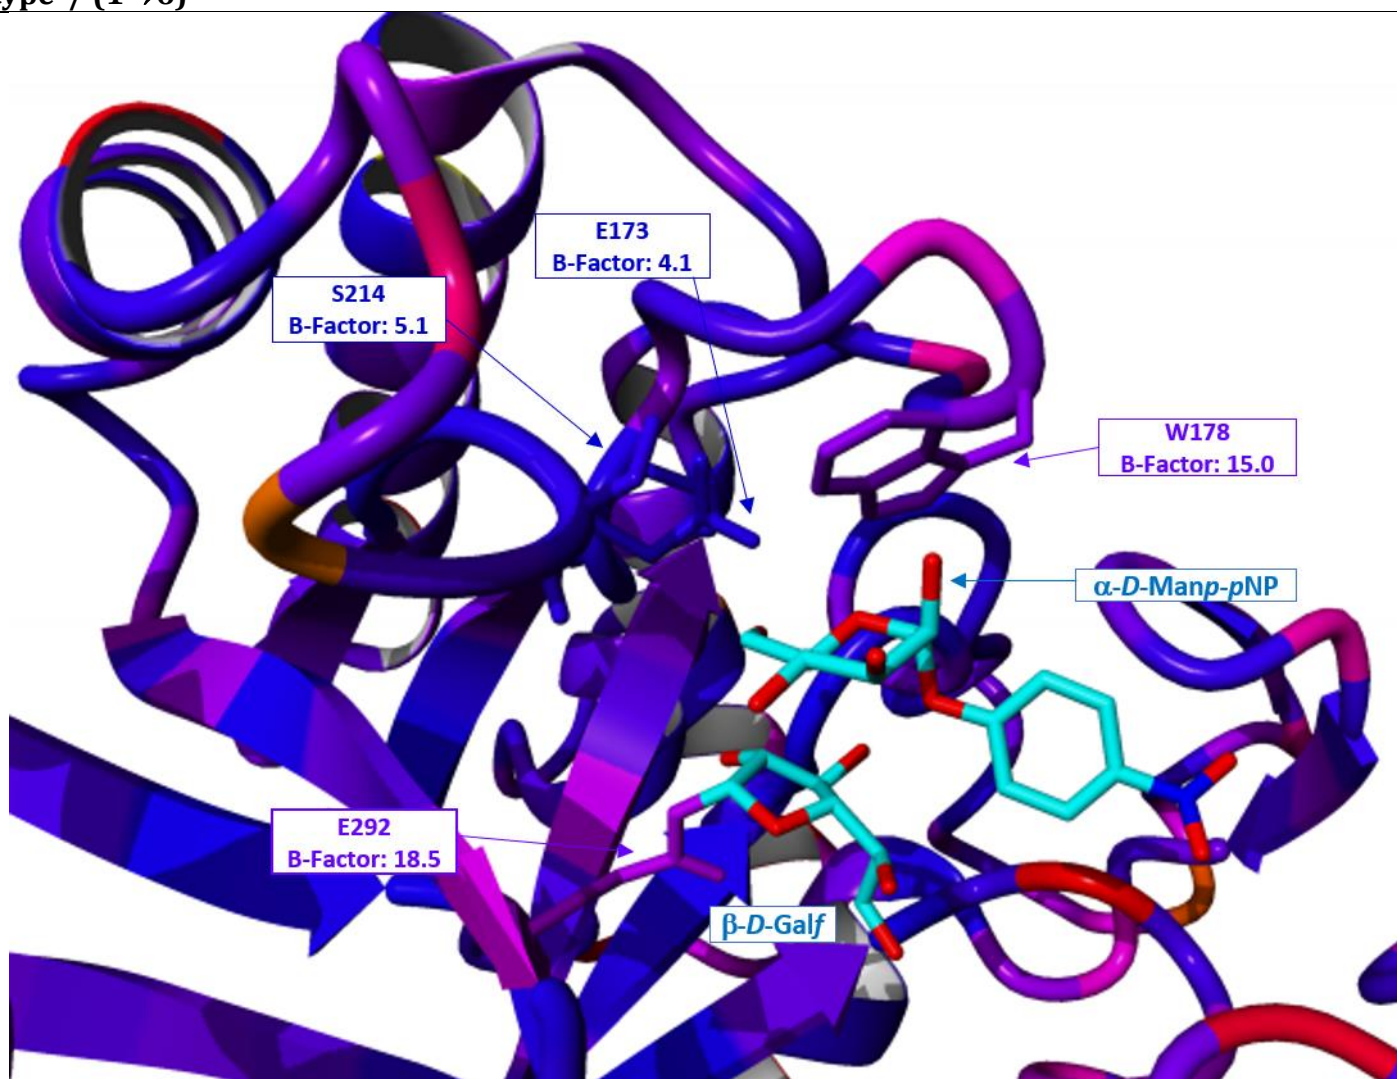

../...

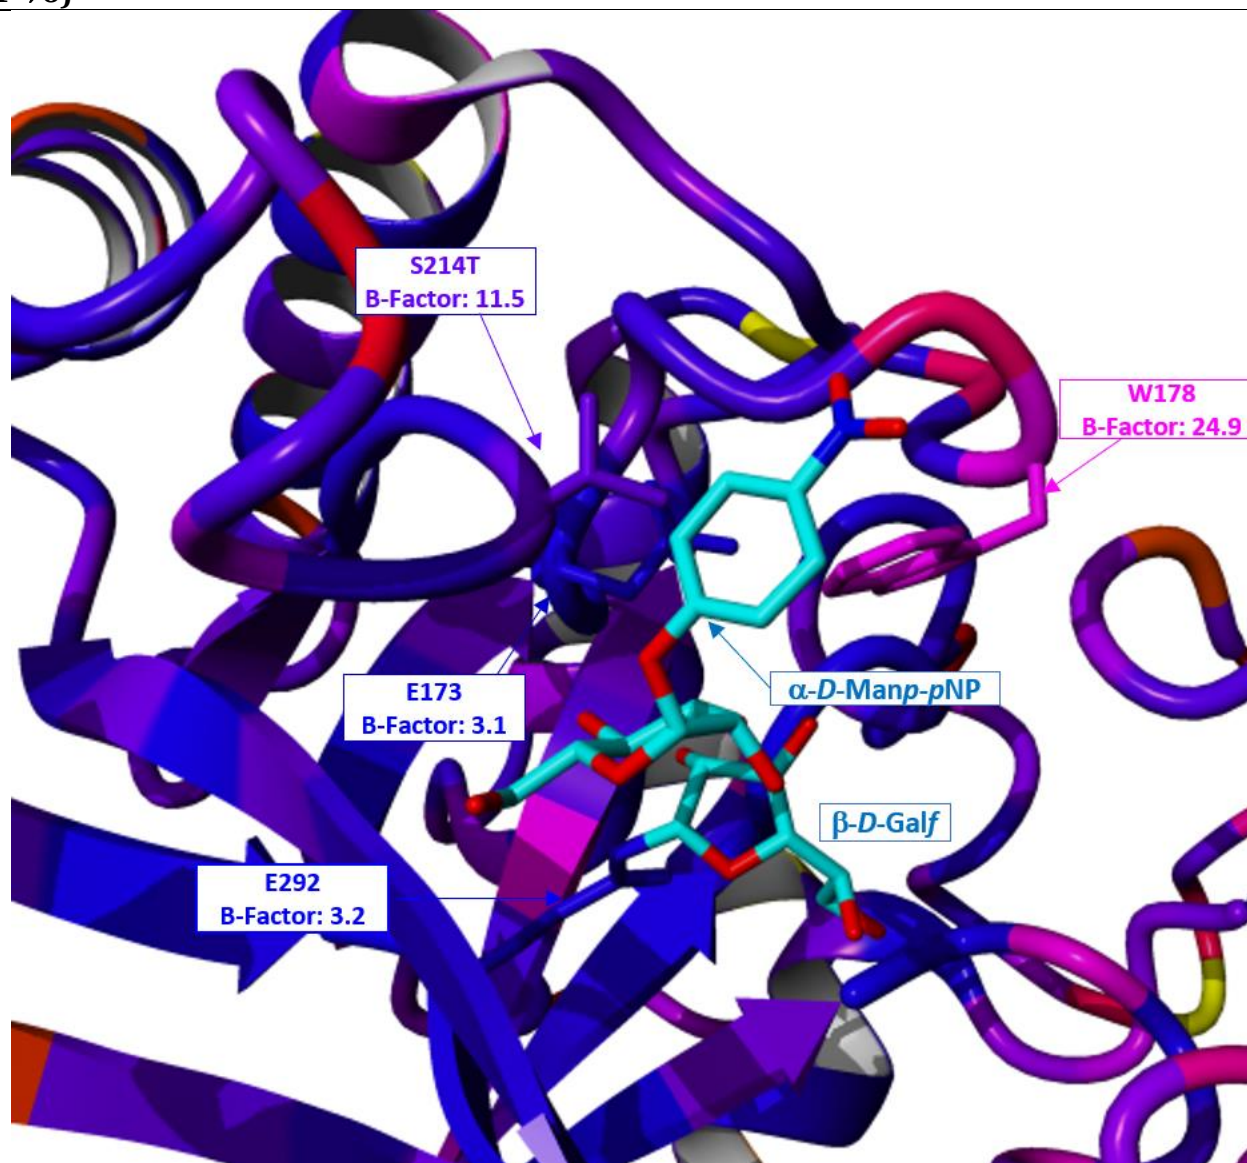

**Figure S5(C1, C2):** B-Factor maps per residue on MD complexes for *CtAra*f51WT - Galf and *CtAra*f51 S214T-Galf intermediates interacting with Manp-pNP according to its initial (1→6)-orientation.

As figures S5, the figures S6 were divided in same three parts (A, B, C) for each initial (1→X)-orientation (X = 3, 4, 6) in order to compare *CtAraf51* WT and *CtAraf51* D327N and present the same colorization according to the scale of B-factors.

#### A1 *CtAraf51* Wild type / (1→3)

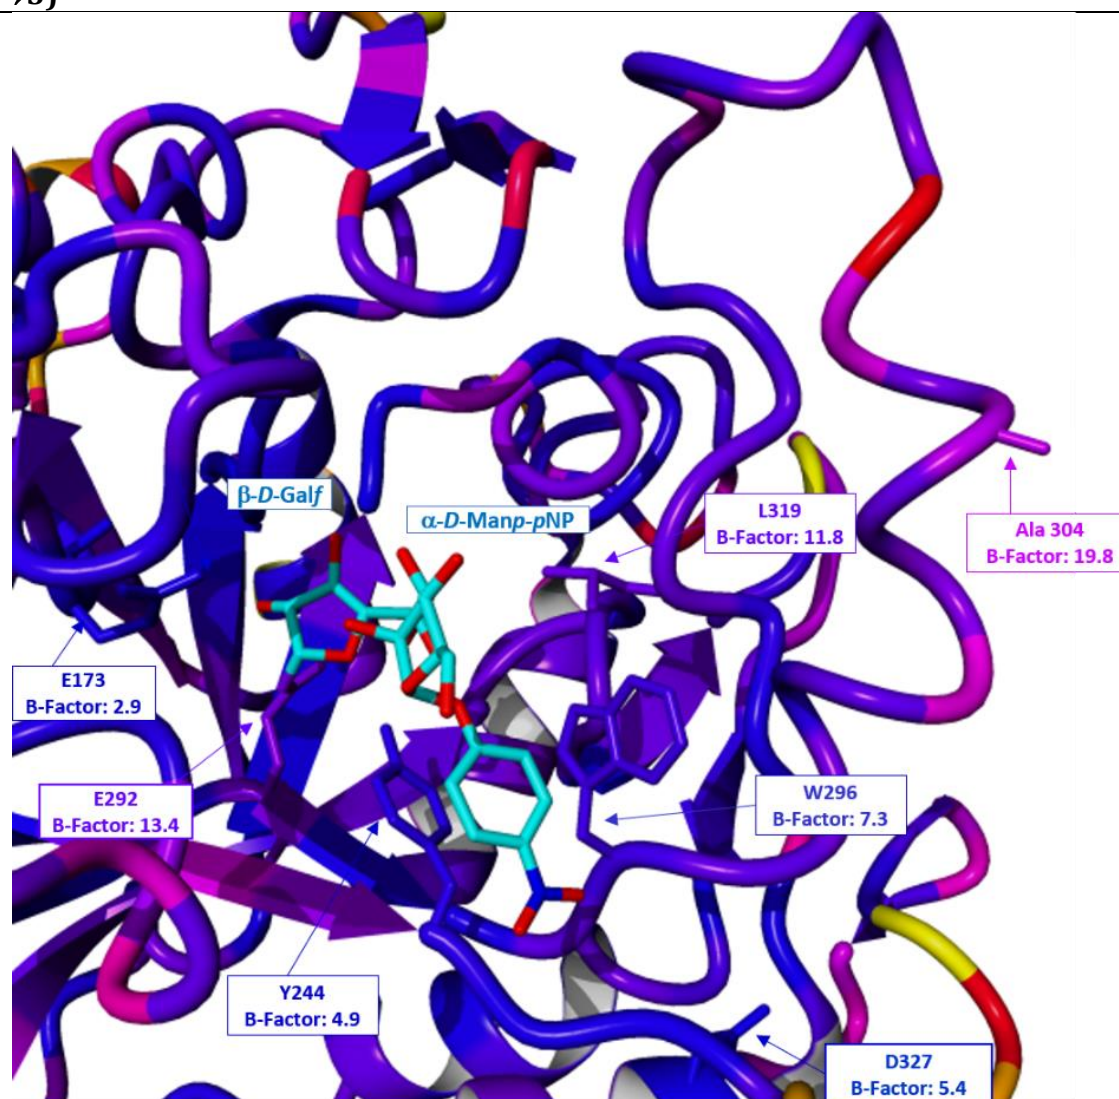

../...

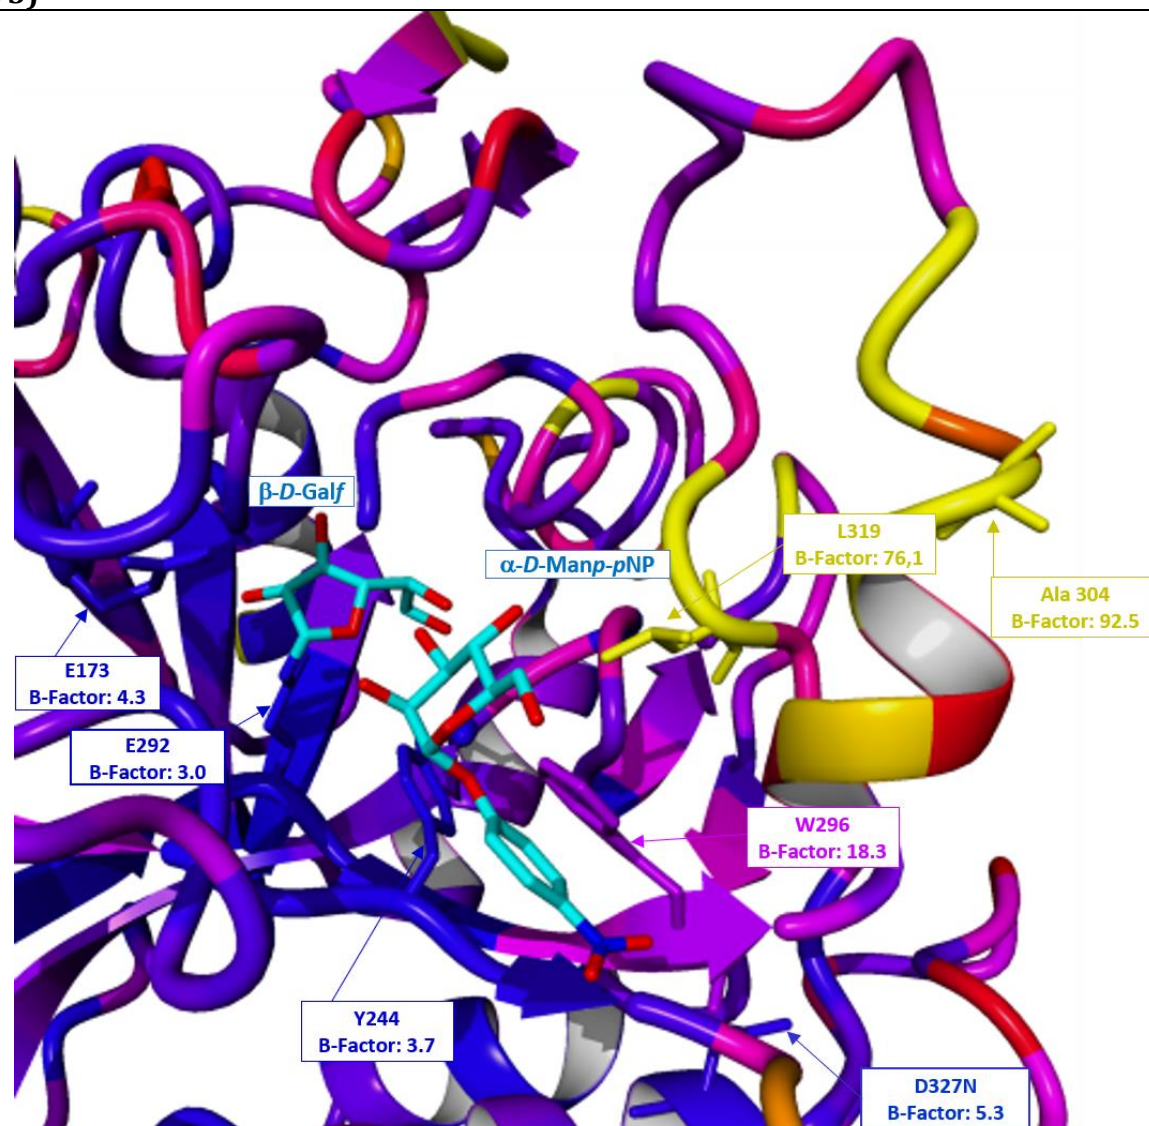

**Figure S6(A1, A2):** B-Factor maps per residue on MD for *CtAraf51* WT and *CtAraf51* D327N-glycosyl-enzyme interacting with Manp-pNP according to its initial (1→3)-orientation.

B1 *CtAraf51* Wild type / (1→4)

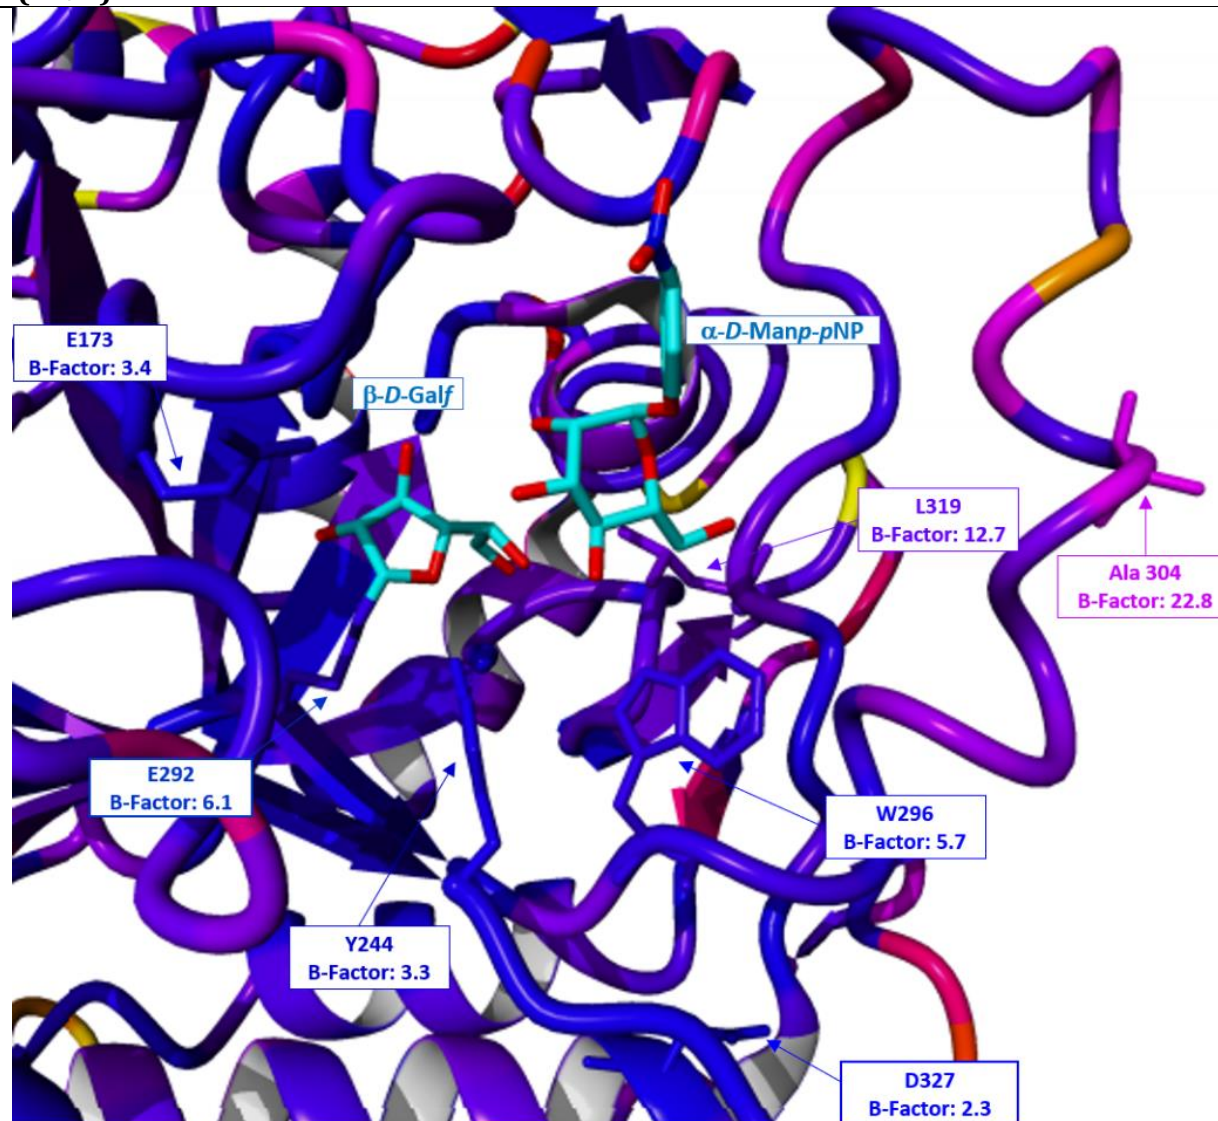

../...

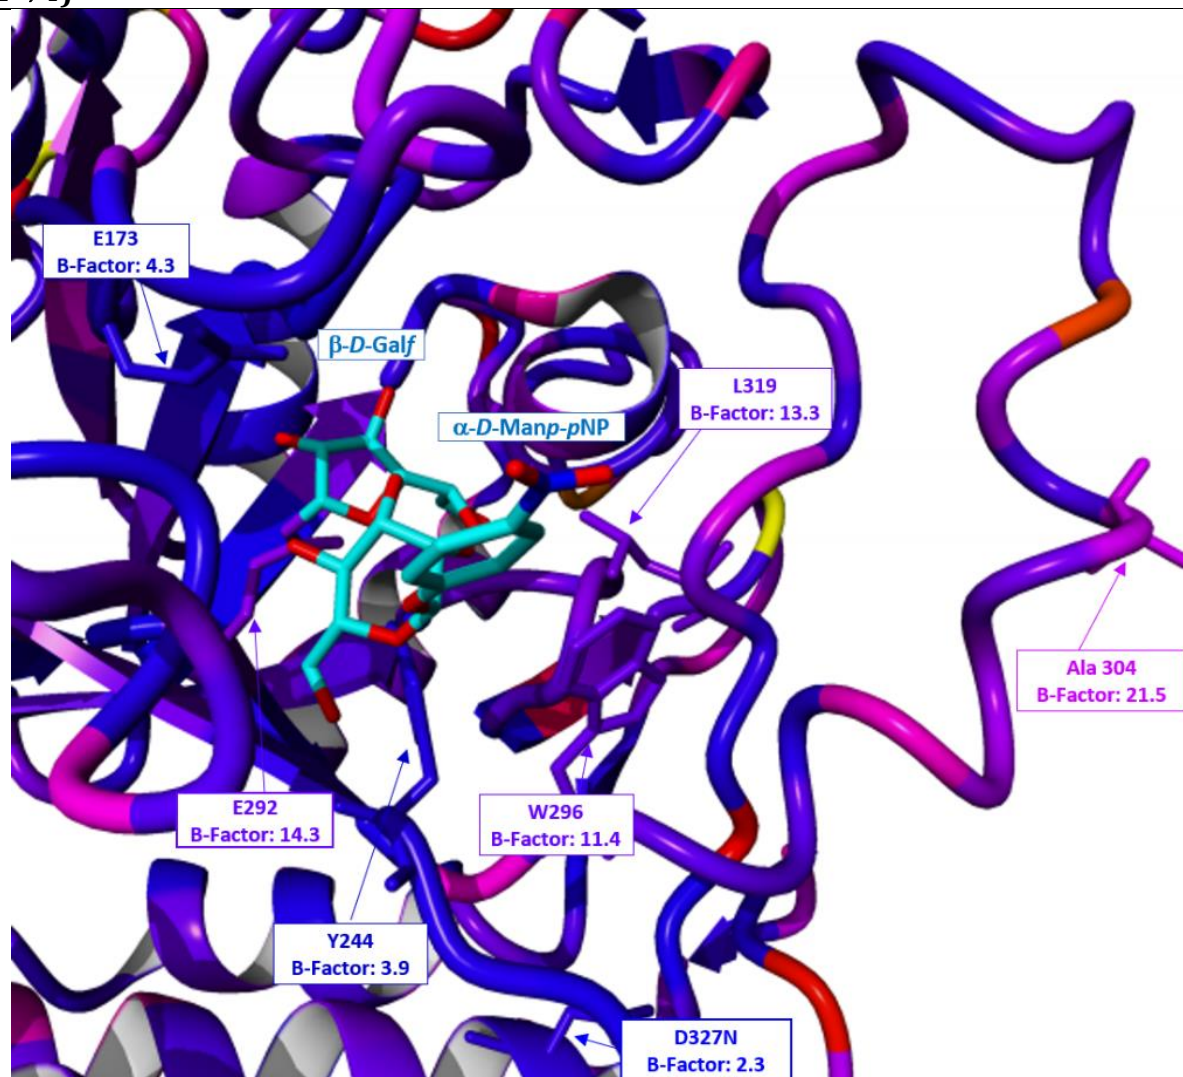

**Figure S6(B1, B2):** B-Factor maps per residue on MD for *CtAraf51* WT and *CtAraf51* D327N-glycosyl-enzyme interacting with Manp-pNP according to its initial (1→4)-orientation.

../...

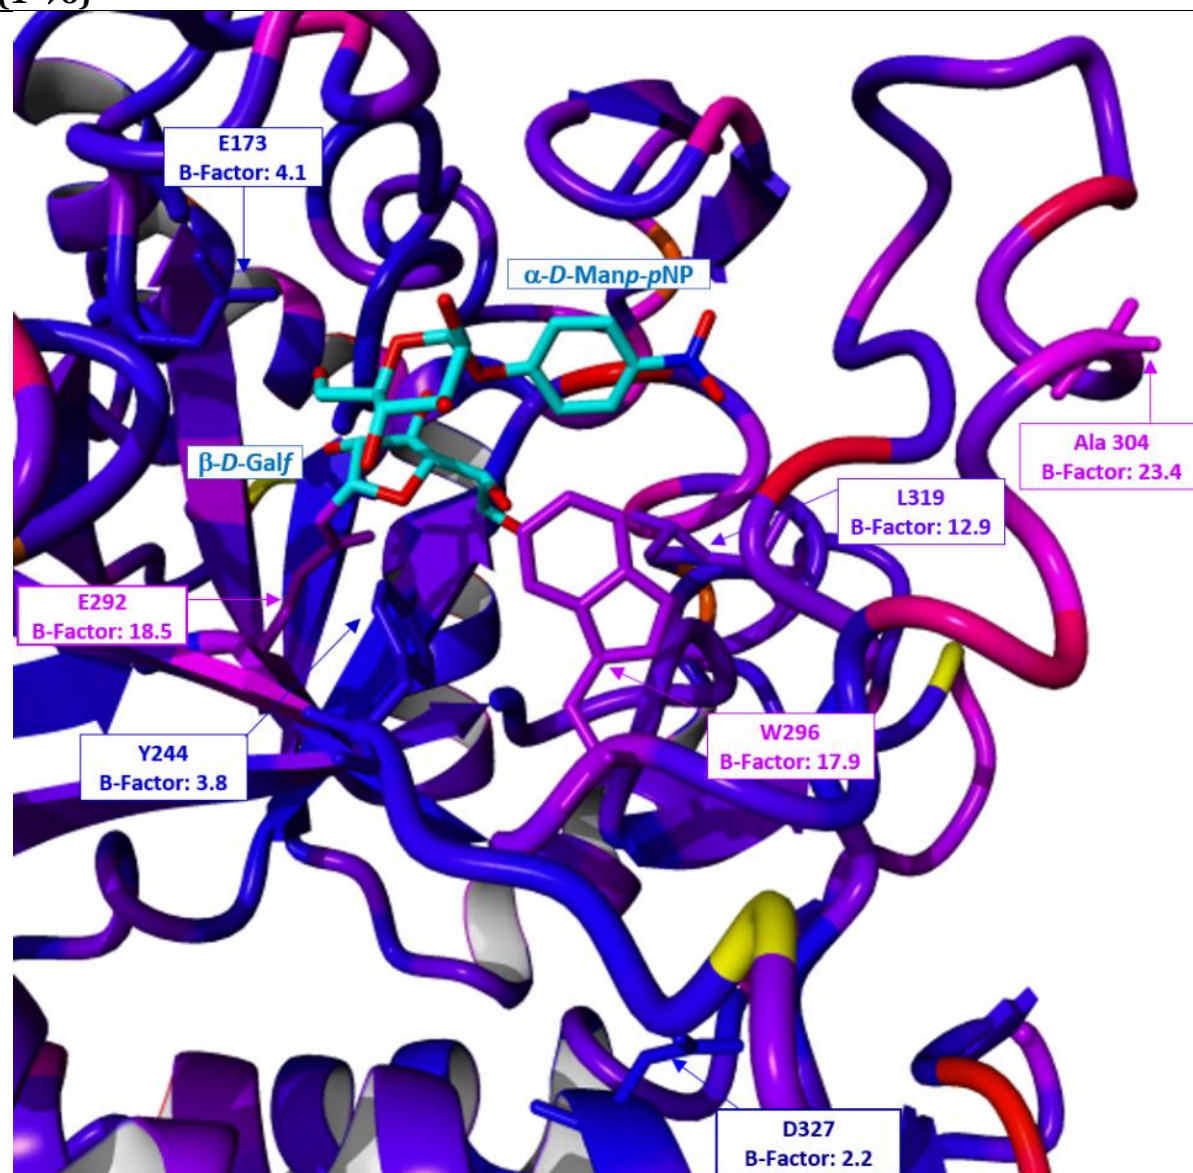

../...

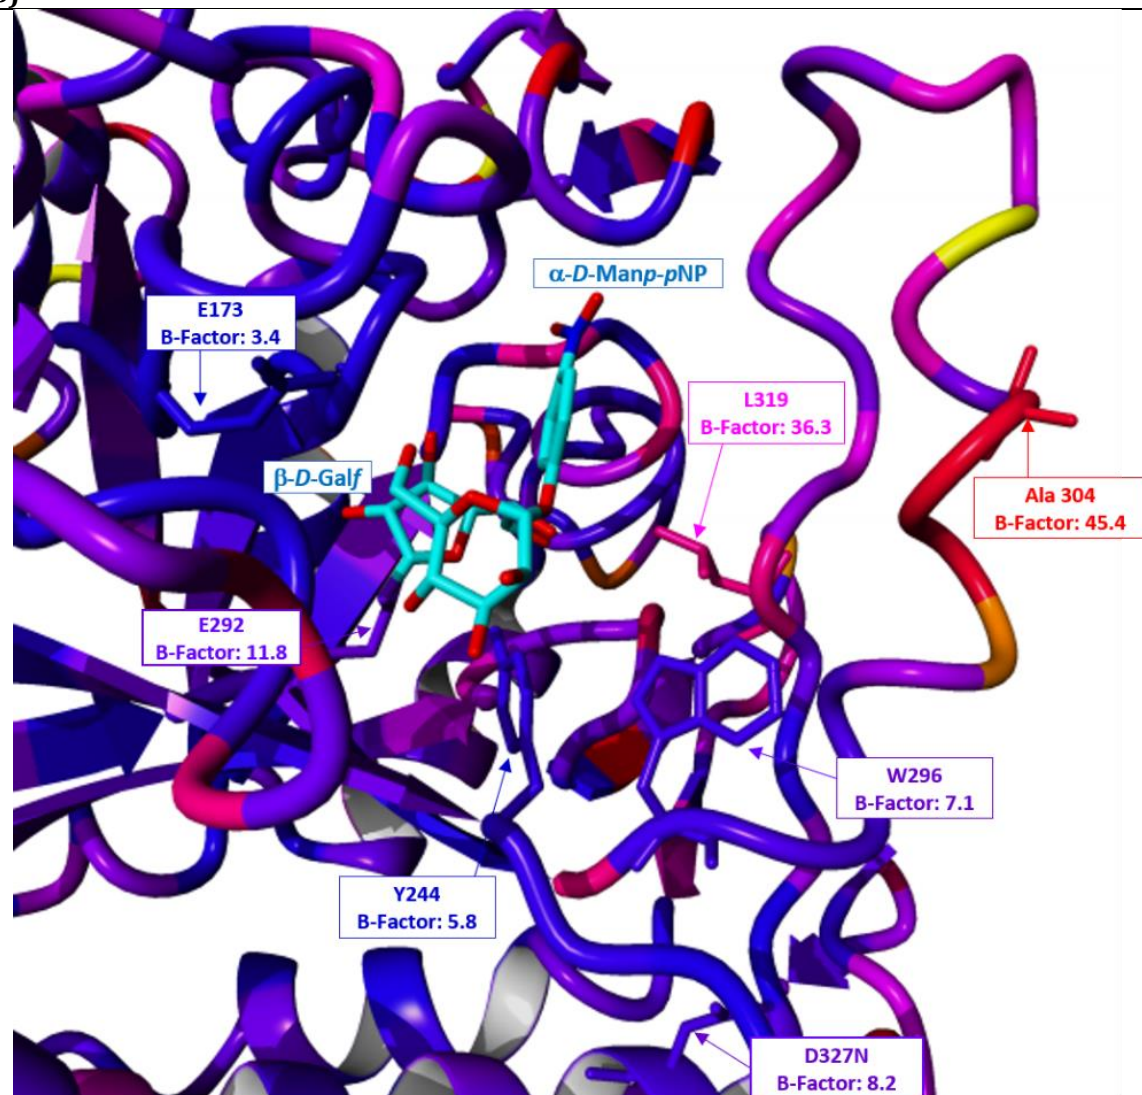

**Figure S6(C1, C2):** B-Factor maps per residue on MD for *CtAraf51* WT and *CtAraf51* D327N-glycosyl-enzyme interacting with Manp-pNP according to its initial (1→6)-orientation.

**SE1: Synthesis of the pre-screen donor substrate 5-bromo-indolyl  $\beta$ -D-galactofuranoside (5-BI-Galf)** (adapted from Berlin et al.<sup>11</sup>).

Perbenzoylated galactofuranosyl bromide and 1-acetyl-5-bromo-indoxyl-3-ol were obtained according to reported procedures.<sup>11,12</sup> Perbenzoylated galactofuranosyl bromide (920 mg, 1.4 mmol), 1-acetyl-5-bromo-indoxyl-3-ol (355 mg, 1.4 mmol) and powdered 4-Å molecular sieves were placed under nitrogen gas. Compounds were dissolved in 40 mL of dry dichloromethane. The mixture was cooled at 0 °C and kept protected from light. Silver triflate (362 mg, 1.4 mmol) was added quickly in one portion and the solution was stirred at room temperature during 1 h 30. The solution was filtered through a plug of celite. The filtrate was concentrated and purified by silica gel chromatography (cyclohexane/EtOAc, 8:2) to afford 823 mg of 1-*N*-acetyl-5-bromo-3-indolyl 2,3,5,6-tetra-*O*-benzoyl- $\beta$ -D-galactofuranoside in 71 % yield. <sup>1</sup>H NMR (400 MHz, CDCl<sub>3</sub>)  $\delta$  (ppm): 8.28-7.24 (m, 24 H, H<sub>arom</sub>), 6.11-6.07 (m, 1H, H-5), 5.91 (s, 1H, H-1), 5.89 (d,  $J_{2,3}$  = 1.2 Hz, 1H, H-2), 5.79 (dd, 1H,  $J_{3,4}$  = 4.8 Hz, H-3), 4.85 (dd, 1H,  $J_{5,6a}$  = 5.2 Hz,  $J_{6a,6b}$  = 11.6 Hz, H-6a), 4.87-4.82 (m, 1H, H-4), 4.70 (dd, 1H,  $J_{5,6b}$  = 6.8 Hz, H-6b), 2.44 (s, 3H, CH<sub>3</sub>). <sup>13</sup>C NMR (100 MHz, CDCl<sub>3</sub>)  $\delta$  (ppm): 168.3, 165.9, 165.6, 165.5, 165.4 (C=O), 139.2, 133.7, 133.4, 133.1, 132.2, 129.9, 129.4, 129.2, 129.1, 129.0, 128.6, 128.5, 128.4, 128.3, 120.5, 108.0 (C<sub>indolyl</sub>, C<sub>6H5</sub>), 105.0 (C-1), 82.8 (C-4), 81.6 (C-2), 76.6 (C-3), 70.1 (C-5), 62.7 (C-6), 23.5 (CH<sub>3</sub>).

1-*N*-acetyl-5-bromo-3-indolyl 2,3,5,6-tetra-*O*-benzoyl- $\beta$ -D-galactofuranoside (0.29 g, 0.35 mmol) was added in a 0.1 M solution of sodium methylate in methanol (0.1 equivalent). After stirring for 3 h at room temperature, the reaction mixture was neutralized by adding Amberlite IR-120 (H<sup>+</sup>-form). The resin was filtered off and the solvent removed under reduced pressure. The resulting crude material was purified by column chromatography (CH<sub>2</sub>Cl<sub>2</sub>/MeOH, 9:1) to give the 5-bromo-indolyl  $\beta$ -D-galactofuranoside (5-BI-Galf) as a slightly blue/green paste in a 90 % yield. <sup>1</sup>H NMR (400 MHz, CD<sub>3</sub>OD)  $\delta$  (ppm): 7.60 (dd, 1H,  $J_{4',6'}$  = 2.0 Hz,  $J_{4',7'}$  = 0.8 Hz, H-4'), 7.17 (dd, 1H,  $J_{7',6'}$  = 8.7 Hz, H-7'), 7.06 (dd, 1H, H-6'), 6.94 (s, 1H, H-2'), 5.20 (d, 1H,  $J_{1,2}$  = 2.0 Hz, H-1), 4.19 (dd, 1H,  $J_{2,3}$  = 4.0 Hz, H-2), 4.06-4.02 (m, 2H, H-3, H-4), 3.69-3.65 (m, 1H, H-5), 3.58 (dd, 1H,  $J_{6a,5}$  = 5.5 Hz,  $J_{6a,6b}$  = 11.0 Hz, H-6a), 3.54 (dd, 1H,  $J_{6b,5}$  = 7.3 Hz, H-6b). <sup>13</sup>C NMR (100 MHz, CD<sub>3</sub>OD)  $\delta$  (ppm): 135.5, 133.7, 126.5 (C-6<sub>indolyl</sub>), 123.1, 121.1 (C-4<sub>indolyl</sub>), 115.8 (C-7<sub>indolyl</sub>), 115.2, 113.4 (C-2<sub>indolyl</sub>), 110.8 (C-1), 85.0 (C-4), 82.4 (C-2), 78.0 (C-3), 72.0 (C-5), 64.4 (C-6). HRMS (ESI<sup>+</sup>): [M + Na]<sup>+</sup> (C<sub>14</sub>H<sub>16</sub>NO<sub>6</sub>BrNa) *m/z* calculated: 396.0058; *m/z* found: 396.0057.

## G(1→X)M disaccharides characterizations.

*p*-nitrophenyl β-D-galactofuranosyl-(1→6)-α-D-mannopyranoside (G(1→6)M):

<sup>1</sup>H NMR (400 MHz, CD<sub>3</sub>OD): δ (ppm): 8.24 (d, 2H, *J*<sub>m</sub> = 9.2 Hz, H<sub>m</sub> C<sub>6</sub>H<sub>4</sub>), 7.29 (d, 2H, *J*<sub>o</sub> = 9.2 Hz, H<sub>o</sub> C<sub>6</sub>H<sub>4</sub>), 5.61 (d, 1H, *J*<sub>1,2</sub> = 1.8 Hz, H-1), 4.93 (d, 1H, *J*<sub>1',2'</sub> = 1.3 Hz, H-1'), 4.04 (dd, 1H, *J*<sub>2,3</sub> = 3.3 Hz, H-2), 3.95 (dd, 1H, *J*<sub>3',4'</sub> = 6.0 Hz, H-3'), 3.94 (d, 1H, *J*<sub>6a,5</sub> = 8.0 Hz, H-6a), 3.88 (dd, 1H, *J*<sub>3,4</sub> = 9.1 Hz, H-3), 3.87 (dd, 1H, *J*<sub>2',3'</sub> = 3.7 Hz, H-2'), 3.88-3.84 (m, 1H, H-4'), 3.73 (dd, 1H, *J*<sub>4,5</sub> = 8.6 Hz, H-4), 3.69-3.65 (m, 1H, H-5'), 3.66 (d, 1H, *J*<sub>6b,5</sub> = 8.0 Hz, H-6b), 3.65-3.61 (m, 1H, H-5), 3.57 (d, 2H, *J*<sub>6',5'</sub> = 6.2 Hz, H-6'). <sup>13</sup>C NMR (100 MHz, CD<sub>3</sub>OD): δ (ppm): 126.7 (C<sub>m</sub> C<sub>6</sub>H<sub>4</sub>), 118.0 (C<sub>o</sub> C<sub>6</sub>H<sub>4</sub>), 109.8 (C-1'), 100.2 (C-1), 84.8 (C-4'), 83.0 (C-2'), 79.1 (C-3'), 74.9 (C-5), 72.5 (C-5'), 72.2 (C-3), 71.5 (C-2), 68.5 (C-4), 68.0 (C-6), 64.5 (C-6'). MS (ESI<sup>-</sup>): [M+HCOO]<sup>-</sup> C<sub>19</sub>H<sub>26</sub>NO<sub>15</sub>; m/z calculated: 508.13; m/z found: 508.05.

*p*-nitrophenyl β-D-galactofuranosyl-(1→4)-α-D-mannopyranoside (G(1→4)M):

<sup>1</sup>H NMR (400 MHz, CD<sub>3</sub>OD): δ (ppm): 8.23 (d, 2H, *J*<sub>m</sub> = 9.2 Hz, H<sub>m</sub> C<sub>6</sub>H<sub>4</sub>), 7.29 (d, 2H, *J*<sub>o</sub> = 9.2 Hz, H<sub>o</sub> C<sub>6</sub>H<sub>4</sub>), 5.66 (d, 1H, *J*<sub>1,2</sub> = 1.8 Hz, H-1), 5.03 (d, 1H, *J*<sub>1',2'</sub> = 2.0 Hz, H-1'), 4.13 (dd, 1H, *J*<sub>4',3'</sub> = 3.3 Hz, *J*<sub>4',5'</sub> = 6.4 Hz, H-4'), 4.10 (dd, 1H, *J*<sub>2,3</sub> = 3.1 Hz, H-2), 4.04 (dd, 1H, *J*<sub>3',2'</sub> = 6.4 Hz, H-3'), 4.01 (dd, 1H, *J*<sub>3,4</sub> = 9.4 Hz, H-3), 3.96 (dd, 1H, *J*<sub>2',3'</sub> = 4.4 Hz, H-2'), 3.95 (app. t, 1H, *J*<sub>4,5</sub> = 9.2 Hz, H-4), 3.74-3.70 (m, 3H, H-5', H-6), 3.65-3.61 (m, 2H, H-6'), 3.61-3.57 (m, 1H, H-5'). <sup>13</sup>C NMR (100 MHz, CD<sub>3</sub>OD): δ (ppm): 126.7 (C<sub>m</sub> C<sub>6</sub>H<sub>4</sub>), 117.7 (C<sub>o</sub> C<sub>6</sub>H<sub>4</sub>), 109.8 (C-1'), 99.8 (C-1), 84.5 (C-4'), 83.0 (C-2'), 78.1 (C-3'), 75.5 (C-4), 74.6 (C-5), 72.2 (C-5'), 71.3 (C-2), 70.9 (C-3), 64.3 (C-6'), 61.8 (C-6). MS (ESI<sup>-</sup>): [M+HCOO]<sup>-</sup> C<sub>19</sub>H<sub>26</sub>NO<sub>15</sub>; m/z calculated: 508.13; m/z found: 508.05.

*p*-nitrophenyl β-D-galactofuranosyl-(1→3)-α-D-mannopyranoside (G(1→3)M):

<sup>1</sup>H NMR (400 MHz, CD<sub>3</sub>OD): δ (ppm): 8.23 (d, 2H, *J*<sub>m</sub> = 9.2 Hz, H<sub>m</sub> C<sub>6</sub>H<sub>4</sub>), 7.29 (d, 2H, *J*<sub>o</sub> = 9.2 Hz, H<sub>o</sub> C<sub>6</sub>H<sub>4</sub>), 5.70 (d, 1H, *J*<sub>1,2</sub> = 1.9 Hz, H-1), 5.17 (d, 1H, *J*<sub>1',2'</sub> = 1.0 Hz, H-1'), 4.24 (dd, 1H, *J*<sub>2,3</sub> = 3.2 Hz, H-2), 4.14 (dd, 1H, *J*<sub>4',3'</sub> = 3.3 Hz, *J*<sub>4',5'</sub> = 5.3 Hz, H-4'), 4.10-4.05 (m, 3H, H-2', H-3', H-3), 3.85 (app. t, 1H, *J*<sub>4,5</sub> = 9.7 Hz, H-4), 3.79-3.61 (m, 5H, H-5', H-6, H-6'), 3.57-3.53 (m, 1H, H-5). <sup>13</sup>C NMR (100 MHz, CD<sub>3</sub>OD): δ (ppm): 162.5 (C<sub>ipso</sub> C<sub>6</sub>H<sub>4</sub>), 143.8 (C<sub>p</sub> C<sub>6</sub>H<sub>4</sub>), 126.7 (C<sub>m</sub> C<sub>6</sub>H<sub>4</sub>), 117.7 (C<sub>o</sub> C<sub>6</sub>H<sub>4</sub>), 106.6 (C-1'), 100.0 (C-1), 85.6 (C-4'), 82.7 (C-2'), 79.1 (C-3'), 76.8 (C-3), 76.0 (C-5), 72.6 (C-5'), 68.2 (C-2), 66.4 (C-4), 64.3 (C-6'), 62.6 (C-6). MS (ESI<sup>-</sup>): [M+HCOO]<sup>-</sup> C<sub>19</sub>H<sub>26</sub>NO<sub>15</sub>; m/z calculated: 508.13; m/z found: 508.05.

*p*-nitrophenyl β-D-galactofuranosyl-(1→2)-α-D-mannopyranoside (G(1→2)M):

<sup>1</sup>H NMR (400 MHz, CD<sub>3</sub>OD): δ (ppm): 8.23 (d, 2H, *J*<sub>m</sub> = 9.2 Hz, H<sub>m</sub> C<sub>6</sub>H<sub>4</sub>), 7.29 (d, 2H, *J*<sub>o</sub> = 9.2 Hz, H<sub>o</sub> C<sub>6</sub>H<sub>4</sub>), 5.84 (d, 1H, *J*<sub>1,2</sub> = 1.5 Hz, H-1), 5.17 (app. s, 1H, H-1'), 4.27 (dd, 1H, *J*<sub>2,3</sub> = 3.5 Hz, H-2), 4.21-4.17 (m, 1H, H-3'), 4.07-4.03 (m, 1H, H-2'), 3.93 (dd, 1H, *J*<sub>3,4</sub> = 9.5 Hz, H-3), 3.77-3.73 (m, 1H, H-4'), 3.70-3.57 (m, 6H, H-5', H-4, H-6', H-6), 3.53-3.49 (m, 1H, H-5)\*. MS (ESI<sup>-</sup>): [M+HCOO]<sup>-</sup> C<sub>19</sub>H<sub>26</sub>NO<sub>15</sub>; m/z calculated: 508.13; m/z found: 508.05.

\* (G(1→2)M) was obtained in mixture with others disaccharides at very low yield, <sup>13</sup>C NMR characterization remained incompleated.
